# Supplementary material for: Virtual Reality Experiments on Emotional Face Recognition Find No Evidence of Mood-Congruent Effects
Source: Front Psychol. 2020 Apr 9;11:479. doi: 10.3389/fpsyg.2020.00479 (PMC7160363; doi:10.3389/fpsyg.2020.00479)
Supplement: Supplementary file 1 [file Data_Sheet_1.xls]

## Sheet: data by participants
Note:
HitRate=Hit/N
FARate=FA/N
#HitRate=(Hit+0.5)./(N+1)
#FARate=(FA+0.5)/(N+1)
A'=0.5+((#HitRate-#FARate)(1+#HitRate-#FARate))/(4#HitRate(1-#FARate))
Pr=#HitRate-#FARate
BD''=（(1-#HitRate)(1-#FARate)-(#HitRate*#FARate））/（（1-#HitRate）（1-#FARate）+（#HitRate*#FARate））
Br=#FARate/(1-Pr)
Experiment a
subject	Hit_GSFF	Hit_GSHF	Hit_PSFF	Hit_PSHF	FA_GSFF	FA_GSHF	FA_PSFF	FA_PSHF	HitRate_GSFF	HitRate_GSHF	HitRate_PSFF	HitRate_PSHF	FARate_GSFF	FARate_GSHF	FARate_PSFF	FARate_PSHF	A'_GSFF	A'_GSHF	A'_PSFF	A'_PSHF	Pr_GSFF	Pr_GSHF	Pr_PSFF	Pr_PSHF	BD''_GSFF	BD''_GSHF	BD''_PSFF	BD''_PSHF	Br_GSFF	Br_GSHF	Br_PSFF	Br_PSHF
sub1	11	11	7	10	2	5	0	7	0.916667	0.916667	0.583333	0.833333	0.166667	0.416667	0	0.583333	0.909938	0.830435	0.873333	0.707792	0.692308	0.461538	0.538462	0.230769	-0.292135	-0.697987	0.896552	-0.702703	0.625	0.785714	0.0833333	0.75
sub2	11	9	8	9	0	0	0	2	0.916667	0.75	0.666667	0.75	0	0	0	0.166667	0.95913	0.916842	0.895294	0.850877	0.846154	0.692308	0.615385	0.538462	0.530612	0.804124	0.859504	0.214876	0.25	0.125	0.1	0.416667
sub3	10	10	10	11	2	4	2	7	0.833333	0.833333	0.833333	0.916667	0.166667	0.333333	0.166667	0.583333	0.880952	0.819328	0.880952	0.768775	0.615385	0.461538	0.615385	0.307692	-8.93465e-17	-0.379562	-8.93465e-17	-0.825397	0.5	0.642857	0.5	0.833333
sub4	10	7	9	9	0	1	0	2	0.833333	0.583333	0.75	0.75	0	0.0833333	0	0.166667	0.938095	0.830435	0.916842	0.850877	0.769231	0.461538	0.692308	0.538462	0.712329	0.697987	0.804124	0.214876	0.166667	0.214286	0.125	0.416667
sub5	7	7	7	8	2	1	0	0	0.583333	0.583333	0.583333	0.666667	0.166667	0.0833333	0	0	0.785714	0.830435	0.873333	0.895294	0.384615	0.461538	0.538462	0.615385	0.509804	0.697987	0.896552	0.859504	0.3125	0.214286	0.0833333	0.1
sub6	11	9	10	10	0	2	2	3	0.916667	0.75	0.833333	0.833333	0	0.166667	0.166667	0.25	0.95913	0.850877	0.880952	0.850877	0.846154	0.538462	0.615385	0.538462	0.530612	0.214876	-8.93465e-17	-0.214876	0.25	0.416667	0.5	0.583333
sub7	10	12	7	11	0	8	0	7	0.833333	1	0.583333	0.916667	0	0.666667	0	0.583333	0.938095	0.802222	0.873333	0.768775	0.769231	0.307692	0.538462	0.307692	0.712329	-0.958525	0.896552	-0.825397	0.166667	0.944444	0.0833333	0.833333
sub8	10	4	12	7	4	3	2	2	0.833333	0.333333	1	0.583333	0.333333	0.25	0.166667	0.166667	0.819328	0.581871	0.938095	0.785714	0.461538	0.0769231	0.769231	0.384615	-0.379562	0.673575	-0.712329	0.509804	0.642857	0.291667	0.833333	0.3125
sub9	7	8	6	9	1	3	0	5	0.583333	0.666667	0.5	0.75	0.0833333	0.25	0	0.416667	0.830435	0.778638	0.850769	0.738596	0.461538	0.384615	0.461538	0.307692	0.697987	0.17931	0.923077	-0.33121	0.214286	0.4375	0.0714286	0.611111
sub10	10	8	4	10	1	2	1	5	0.833333	0.666667	0.333333	0.833333	0.0833333	0.166667	0.0833333	0.416667	0.909938	0.819328	0.731884	0.785714	0.692308	0.461538	0.230769	0.384615	0.292135	0.379562	0.870813	-0.509804	0.375	0.357143	0.15	0.6875
sub11	9	9	7	8	0	1	1	0	0.75	0.75	0.583333	0.666667	0	0.0833333	0.0833333	0	0.916842	0.884439	0.830435	0.895294	0.692308	0.615385	0.461538	0.615385	0.804124	0.477064	0.697987	0.859504	0.125	0.3	0.214286	0.1
sub12	8	11	10	10	2	5	2	4	0.666667	0.916667	0.833333	0.833333	0.166667	0.416667	0.166667	0.333333	0.819328	0.830435	0.880952	0.819328	0.461538	0.461538	0.615385	0.461538	0.379562	-0.697987	-8.93465e-17	-0.379562	0.357143	0.785714	0.5	0.642857
sub13	9	8	6	11	4	4	3	5	0.75	0.666667	0.5	0.916667	0.333333	0.333333	0.25	0.416667	0.778638	0.735294	0.694332	0.830435	0.384615	0.307692	0.230769	0.461538	-0.17931	0	0.461538	-0.697987	0.5625	0.5	0.35	0.785714
sub14	11	10	9	11	1	0	1	0	0.916667	0.833333	0.75	0.916667	0.0833333	0	0.0833333	0	0.934783	0.938095	0.884439	0.95913	0.769231	0.769231	0.615385	0.846154	6.7981e-17	0.712329	0.477064	0.530612	0.5	0.166667	0.3	0.25
sub15	9	9	6	9	2	2	1	2	0.75	0.75	0.5	0.75	0.166667	0.166667	0.0833333	0.166667	0.850877	0.850877	0.801003	0.850877	0.538462	0.538462	0.384615	0.538462	0.214876	0.214876	0.769231	0.214876	0.416667	0.416667	0.1875	0.416667
sub16	9	6	11	9	3	2	2	4	0.75	0.5	0.916667	0.75	0.25	0.166667	0.166667	0.333333	0.815789	0.749084	0.909938	0.778638	0.461538	0.307692	0.692308	0.384615	2.1161e-16	0.615385	-0.292135	-0.17931	0.5	0.277778	0.625	0.5625
sub17	12	10	11	11	2	1	0	2	1	0.833333	0.916667	0.916667	0.166667	0.0833333	0	0.166667	0.938095	0.909938	0.95913	0.909938	0.769231	0.692308	0.846154	0.692308	-0.712329	0.292135	0.530612	-0.292135	0.833333	0.375	0.25	0.625
sub18	11	9	6	9	0	1	1	2	0.916667	0.75	0.5	0.75	0	0.0833333	0.0833333	0.166667	0.95913	0.884439	0.801003	0.850877	0.846154	0.615385	0.384615	0.538462	0.530612	0.477064	0.769231	0.214876	0.25	0.3	0.1875	0.416667
sub19	8	7	10	11	2	2	0	5	0.666667	0.583333	0.833333	0.916667	0.166667	0.166667	0	0.416667	0.819328	0.785714	0.938095	0.830435	0.461538	0.384615	0.769231	0.461538	0.379562	0.509804	0.712329	-0.697987	0.357143	0.3125	0.166667	0.785714
sub20	8	8	6	8	0	2	1	1	0.666667	0.666667	0.5	0.666667	0	0.166667	0.0833333	0.0833333	0.895294	0.819328	0.801003	0.858056	0.615385	0.461538	0.384615	0.538462	0.859504	0.379562	0.769231	0.604651	0.1	0.357143	0.1875	0.25
sub21	11	5	6	9	2	4	1	2	0.916667	0.416667	0.5	0.75	0.166667	0.333333	0.0833333	0.166667	0.909938	0.574866	0.801003	0.850877	0.692308	0.0769231	0.384615	0.538462	-0.292135	0.440678	0.769231	0.214876	0.625	0.375	0.1875	0.416667
sub22	6	6	8	10	0	1	1	1	0.5	0.5	0.666667	0.833333	0	0.0833333	0.0833333	0.0833333	0.850769	0.801003	0.858056	0.909938	0.461538	0.384615	0.538462	0.692308	0.923077	0.769231	0.604651	0.292135	0.0714286	0.1875	0.25	0.375
sub23	9	9	8	10	1	5	1	3	0.75	0.75	0.666667	0.833333	0.0833333	0.416667	0.0833333	0.25	0.884439	0.738596	0.858056	0.850877	0.615385	0.307692	0.538462	0.538462	0.477064	-0.33121	0.604651	-0.214876	0.3	0.611111	0.25	0.583333
sub24	10	8	12	12	6	4	3	4	0.833333	0.666667	1	1	0.5	0.333333	0.25	0.333333	0.749084	0.735294	0.916842	0.895294	0.307692	0.307692	0.692308	0.615385	-0.615385	0	-0.804124	-0.859504	0.722222	0.5	0.875	0.9
sub25	9	7	11	11	1	5	0	3	0.75	0.583333	0.916667	0.916667	0.0833333	0.416667	0	0.25	0.884439	0.633333	0.95913	0.884439	0.615385	0.153846	0.846154	0.615385	0.477064	5.68569e-17	0.530612	-0.477064	0.3	0.5	0.25	0.7
sub26	10	12	10	10	4	7	5	4	0.833333	1	0.833333	0.833333	0.333333	0.583333	0.416667	0.333333	0.819328	0.827273	0.785714	0.819328	0.461538	0.384615	0.384615	0.461538	-0.379562	-0.943005	-0.509804	-0.379562	0.642857	0.9375	0.6875	0.642857
sub27	11	8	11	9	1	2	1	1	0.916667	0.666667	0.916667	0.75	0.0833333	0.166667	0.0833333	0.0833333	0.934783	0.819328	0.934783	0.884439	0.769231	0.461538	0.769231	0.615385	6.7981e-17	0.379562	6.7981e-17	0.477064	0.5	0.357143	0.5	0.3
sub28	10	9	11	9	4	3	2	0	0.833333	0.75	0.916667	0.75	0.333333	0.25	0.166667	0	0.819328	0.815789	0.909938	0.916842	0.461538	0.461538	0.692308	0.692308	-0.379562	2.1161e-16	-0.292135	0.804124	0.642857	0.5	0.625	0.125
sub29	9	9	9	9	0	1	5	6	0.75	0.75	0.75	0.75	0	0.0833333	0.416667	0.5	0.916842	0.884439	0.738596	0.694332	0.692308	0.615385	0.307692	0.230769	0.804124	0.477064	-0.33121	-0.461538	0.125	0.3	0.611111	0.65
sub30	8	10	11	7	0	2	0	2	0.666667	0.833333	0.916667	0.583333	0	0.166667	0	0.166667	0.895294	0.880952	0.95913	0.785714	0.615385	0.615385	0.846154	0.384615	0.859504	-8.93465e-17	0.530612	0.509804	0.1	0.5	0.25	0.3125
sub31	11	8	7	10	4	1	0	5	0.916667	0.666667	0.583333	0.833333	0.333333	0.0833333	0	0.416667	0.858056	0.858056	0.873333	0.785714	0.538462	0.538462	0.538462	0.384615	-0.604651	0.604651	0.896552	-0.509804	0.75	0.25	0.0833333	0.6875
sub32	9	8	10	8	0	1	1	2	0.75	0.666667	0.833333	0.666667	0	0.0833333	0.0833333	0.166667	0.916842	0.858056	0.909938	0.819328	0.692308	0.538462	0.692308	0.461538	0.804124	0.604651	0.292135	0.379562	0.125	0.25	0.375	0.357143
Mean									0.791667	0.705729	0.71875	0.794271	0.132812	0.221354	0.101562	0.255208	0.878063	0.808595	0.866239	0.833857	0.608173	0.447115	0.569712	0.497596	0.239512	0.206038	0.394409	-0.0517991	0.387785	0.42154	0.326333	0.513424
SD									0.117851	0.152612	0.180538	0.103661	0.1353	0.163422	0.111471	0.175744	0.0583465	0.0861253	0.0678817	0.0619815	0.151797	0.165141	0.173507	0.143557	0.50167	0.499689	0.520256	0.539731	0.220839	0.211281	0.230049	0.226353
SE									0.0208333	0.0269783	0.031915	0.0183249	0.0239179	0.0288892	0.0197055	0.0310675	0.0103143	0.0152249	0.0119999	0.0109569	0.0268342	0.029193	0.030672	0.0253776	0.0886835	0.0883333	0.0919692	0.0954119	0.0390393	0.0373496	0.0406673	0.040014
Experiment b
subject	Hit_GSFF	Hit_GSHF	Hit_PSFF	Hit_PSHF	FA_GSFF	FA_GSHF	FA_PSFF	FA_PSHF	HitRate_GSFF	HitRate_GSHF	HitRate_PSFF	HitRate_PSHF	FARate_GSFF	FARate_GSHF	FARate_PSFF	FARate_PSHF	A'_GSFF	A'_GSHF	A'_PSFF	A'_PSHF	Pr_GSFF	Pr_GSHF	Pr_PSFF	Pr_PSHF	BD''_GSFF	BD''_GSHF	BD''_PSFF	BD''_PSHF	Br_GSFF	Br_GSHF	Br_PSFF	Br_PSHF
sub1	9	10	10	9	8	7	3	4	0.75	0.833333	0.833333	0.75	0.666667	0.583333	0.25	0.333333	0.581871	0.707792	0.850877	0.778638	0.0769231	0.230769	0.538462	0.384615	-0.673575	-0.702703	-0.214876	-0.17931	0.708333	0.75	0.583333	0.5625
sub2	7	5	10	9	4	3	0	4	0.583333	0.416667	0.833333	0.75	0.333333	0.25	0	0.333333	0.688235	0.643541	0.938095	0.778638	0.230769	0.153846	0.769231	0.384615	0.161491	0.574586	0.712329	-0.17931	0.45	0.318182	0.166667	0.5625
sub3	11	12	11	11	0	2	0	4	0.916667	1	0.916667	0.916667	0	0.166667	0	0.333333	0.95913	0.938095	0.95913	0.858056	0.846154	0.769231	0.846154	0.538462	0.530612	-0.712329	0.530612	-0.604651	0.25	0.833333	0.25	0.75
sub4	11	10	10	10	1	1	0	2	0.916667	0.833333	0.833333	0.833333	0.0833333	0.0833333	0	0.166667	0.934783	0.909938	0.938095	0.880952	0.769231	0.692308	0.769231	0.615385	6.7981e-17	0.292135	0.712329	-8.93465e-17	0.5	0.375	0.166667	0.5
sub5	11	8	6	8	0	6	1	4	0.916667	0.666667	0.5	0.666667	0	0.5	0.0833333	0.333333	0.95913	0.635747	0.801003	0.735294	0.846154	0.153846	0.384615	0.307692	0.530612	-0.307692	0.769231	0	0.25	0.590909	0.1875	0.5
sub6	10	6	10	10	0	0	0	0	0.833333	0.5	0.833333	0.833333	0	0	0	0	0.938095	0.850769	0.938095	0.938095	0.769231	0.461538	0.769231	0.769231	0.712329	0.923077	0.712329	0.712329	0.166667	0.0714286	0.166667	0.166667
sub7	9	6	7	8	1	3	5	1	0.75	0.5	0.583333	0.666667	0.0833333	0.25	0.416667	0.0833333	0.884439	0.694332	0.633333	0.858056	0.615385	0.230769	0.153846	0.538462	0.477064	0.461538	5.68569e-17	0.604651	0.3	0.35	0.5	0.25
sub8	7	8	10	9	4	3	1	4	0.583333	0.666667	0.833333	0.75	0.333333	0.25	0.0833333	0.333333	0.688235	0.778638	0.909938	0.778638	0.230769	0.384615	0.692308	0.384615	0.161491	0.17931	0.292135	-0.17931	0.45	0.4375	0.375	0.5625
sub9	11	10	8	10	2	3	1	1	0.916667	0.833333	0.666667	0.833333	0.166667	0.25	0.0833333	0.0833333	0.909938	0.850877	0.858056	0.909938	0.692308	0.538462	0.538462	0.692308	-0.292135	-0.214876	0.604651	0.292135	0.625	0.583333	0.25	0.375
sub10	9	9	7	11	5	9	0	5	0.75	0.75	0.583333	0.916667	0.416667	0.75	0	0.416667	0.738596	0.5	0.873333	0.830435	0.307692	0	0.538462	0.461538	-0.33121	-0.760976	0.896552	-0.697987	0.611111	0.730769	0.0833333	0.785714
sub11	9	7	10	7	0	3	1	0	0.75	0.583333	0.833333	0.583333	0	0.25	0.0833333	0	0.916842	0.738596	0.909938	0.873333	0.692308	0.307692	0.692308	0.538462	0.804124	0.33121	0.292135	0.896552	0.125	0.388889	0.375	0.0833333
sub12	5	8	10	4	2	4	4	8	0.416667	0.666667	0.833333	0.333333	0.166667	0.333333	0.333333	0.666667	0.707792	0.735294	0.819328	0.0555556	0.230769	0.307692	0.461538	-0.307692	0.702703	0	-0.379562	0	0.25	0.5	0.642857	0.5
sub13	10	6	4	10	0	1	0	3	0.833333	0.5	0.333333	0.833333	0	0.0833333	0	0.25	0.938095	0.801003	0.802222	0.850877	0.769231	0.384615	0.307692	0.538462	0.712329	0.769231	0.958525	-0.214876	0.166667	0.1875	0.0555556	0.583333
sub14	9	1	9	9	0	1	0	0	0.75	0.0833333	0.75	0.75	0	0.0833333	0	0	0.916842	0.5	0.916842	0.916842	0.692308	0	0.692308	0.692308	0.804124	0.966543	0.804124	0.804124	0.125	0.115385	0.125	0.125
sub15	9	10	8	8	2	2	0	1	0.75	0.833333	0.666667	0.666667	0.166667	0.166667	0	0.0833333	0.850877	0.880952	0.895294	0.858056	0.538462	0.615385	0.615385	0.538462	0.214876	-8.93465e-17	0.859504	0.604651	0.416667	0.5	0.1	0.25
sub16	11	8	10	7	0	0	0	0	0.916667	0.666667	0.833333	0.583333	0	0	0	0	0.95913	0.895294	0.938095	0.873333	0.846154	0.615385	0.769231	0.538462	0.530612	0.859504	0.712329	0.896552	0.25	0.1	0.166667	0.0833333
sub17	10	10	8	8	1	1	1	4	0.833333	0.833333	0.666667	0.666667	0.0833333	0.0833333	0.0833333	0.333333	0.909938	0.909938	0.858056	0.735294	0.692308	0.692308	0.538462	0.307692	0.292135	0.292135	0.604651	0	0.375	0.375	0.25	0.5
sub18	11	5	8	11	3	1	1	0	0.916667	0.416667	0.666667	0.916667	0.25	0.0833333	0.0833333	0	0.884439	0.768775	0.858056	0.95913	0.615385	0.307692	0.538462	0.846154	-0.477064	0.825397	0.604651	0.530612	0.7	0.166667	0.25	0.25
sub19	10	8	11	9	1	4	0	0	0.833333	0.666667	0.916667	0.75	0.0833333	0.333333	0	0	0.909938	0.735294	0.95913	0.916842	0.692308	0.307692	0.846154	0.692308	0.292135	0	0.530612	0.804124	0.375	0.5	0.25	0.125
sub20	11	12	11	9	1	0	0	3	0.916667	1	0.916667	0.75	0.0833333	0	0	0.25	0.934783	0.98	0.95913	0.815789	0.769231	0.923077	0.846154	0.461538	6.7981e-17	-3.75255e-16	0.530612	2.1161e-16	0.5	0.5	0.25	0.5
sub21	5	11	7	8	3	3	4	7	0.416667	0.916667	0.583333	0.666667	0.25	0.25	0.333333	0.583333	0.643541	0.884439	0.688235	0.574866	0.153846	0.615385	0.230769	0.0769231	0.574586	-0.477064	0.161491	-0.440678	0.318182	0.7	0.45	0.625
sub22	8	4	7	9	0	2	1	2	0.666667	0.333333	0.583333	0.75	0	0.166667	0.0833333	0.166667	0.895294	0.65873	0.830435	0.850877	0.615385	0.153846	0.461538	0.538462	0.859504	0.776119	0.697987	0.214876	0.1	0.227273	0.214286	0.416667
sub23	9	9	11	11	0	0	0	1	0.75	0.75	0.916667	0.916667	0	0	0	0.0833333	0.916842	0.916842	0.95913	0.934783	0.692308	0.692308	0.846154	0.769231	0.804124	0.804124	0.530612	6.7981e-17	0.125	0.125	0.25	0.5
sub24	7	7	6	5	2	2	6	2	0.583333	0.583333	0.5	0.416667	0.166667	0.166667	0.5	0.166667	0.785714	0.785714	0.5	0.707792	0.384615	0.384615	0	0.230769	0.509804	0.509804	0	0.702703	0.3125	0.3125	0.5	0.25
sub25	12	8	10	7	0	0	1	3	1	0.666667	0.833333	0.583333	0	0	0.0833333	0.25	0.98	0.895294	0.909938	0.738596	0.923077	0.615385	0.692308	0.307692	-3.75255e-16	0.859504	0.292135	0.33121	0.5	0.1	0.375	0.388889
sub26	8	8	8	10	1	1	1	1	0.666667	0.666667	0.666667	0.833333	0.0833333	0.0833333	0.0833333	0.0833333	0.858056	0.858056	0.858056	0.909938	0.538462	0.538462	0.538462	0.692308	0.604651	0.604651	0.604651	0.292135	0.25	0.25	0.25	0.375
sub27	9	4	7	10	3	2	1	6	0.75	0.333333	0.583333	0.833333	0.25	0.166667	0.0833333	0.5	0.815789	0.65873	0.830435	0.749084	0.461538	0.153846	0.461538	0.307692	2.1161e-16	0.776119	0.697987	-0.615385	0.5	0.227273	0.214286	0.722222
sub28	8	7	5	9	0	1	0	3	0.666667	0.583333	0.416667	0.75	0	0.0833333	0	0.25	0.895294	0.830435	0.827273	0.815789	0.615385	0.461538	0.384615	0.461538	0.859504	0.697987	0.943005	2.1161e-16	0.1	0.214286	0.0625	0.5
sub29	10	12	9	12	2	2	1	7	0.833333	1	0.75	1	0.166667	0.166667	0.0833333	0.583333	0.880952	0.938095	0.884439	0.827273	0.615385	0.769231	0.615385	0.384615	-8.93465e-17	-0.712329	0.477064	-0.943005	0.5	0.833333	0.3	0.9375
sub30	9	7	9	6	2	1	1	0	0.75	0.583333	0.75	0.5	0.166667	0.0833333	0.0833333	0	0.850877	0.830435	0.884439	0.850769	0.538462	0.461538	0.615385	0.461538	0.214876	0.697987	0.477064	0.923077	0.416667	0.214286	0.3	0.0714286
sub31	8	3	8	6	2	1	1	4	0.666667	0.25	0.666667	0.5	0.166667	0.0833333	0.0833333	0.333333	0.819328	0.686335	0.858056	0.635747	0.461538	0.153846	0.538462	0.153846	0.379562	0.908297	0.604651	0.307692	0.357143	0.136364	0.25	0.409091
sub32	6	3	4	6	0	0	0	1	0.5	0.25	0.333333	0.5	0	0	0	0.0833333	0.850769	0.774286	0.802222	0.801003	0.461538	0.230769	0.307692	0.384615	0.923077	0.970954	0.958525	0.769231	0.0714286	0.05	0.0555556	0.1875
Mean									0.752604	0.630208	0.700521	0.71875	0.130208	0.179688	0.0911458	0.221354	0.856362	0.786633	0.857772	0.799947	0.574519	0.415865	0.5625	0.459135	0.340073	0.318508	0.530564	0.176004	0.348293	0.367632	0.262996	0.418693
SD									0.148897	0.230841	0.166478	0.158043	0.152543	0.174685	0.131096	0.191215	0.101385	0.122248	0.0987156	0.16143	0.221039	0.239184	0.211736	0.229096	0.418936	0.562863	0.330469	0.515755	0.180851	0.232862	0.148957	0.222695
SE									0.0263216	0.0408072	0.0294294	0.0279383	0.0269661	0.0308803	0.0231747	0.0338024	0.0179224	0.0216107	0.0174506	0.0285371	0.0390746	0.0422822	0.0374299	0.0404988	0.074058	0.0995011	0.0584192	0.0911735	0.0319703	0.0411646	0.026332	0.0393672
Experiment c
subject	Hit_GSFF	Hit_GSHF	Hit_PSFF	Hit_PSHF	FA_GSFF	FA_GSHF	FA_PSFF	FA_PSHF	HitRate_GSFF	HitRate_GSHF	HitRate_PSFF	HitRate_PSHF	FARate_GSFF	FARate_GSHF	FARate_PSFF	FARate_PSHF	A'_GSFF	A'_GSHF	A'_PSFF	A'_PSHF	Pr_GSFF	Pr_GSHF	Pr_PSFF	Pr_PSHF	BD''_GSFF	BD''_GSHF	BD''_PSFF	BD''_PSHF	Br_GSFF	Br_GSHF	Br_PSFF	Br_PSHF
sub1	12	10	10	10	0	0	0	0	1	0.833333	0.833333	0.833333	0	0	0	0	0.98	0.938095	0.938095	0.938095	0.923077	0.769231	0.769231	0.769231	-3.75255e-16	0.712329	0.712329	0.712329	0.5	0.166667	0.166667	0.166667
sub2	10	9	10	10	0	0	0	1	0.833333	0.75	0.833333	0.833333	0	0	0	0.0833333	0.938095	0.916842	0.938095	0.909938	0.769231	0.692308	0.769231	0.692308	0.712329	0.804124	0.712329	0.292135	0.166667	0.125	0.166667	0.375
sub3	9	7	11	8	1	1	0	0	0.75	0.583333	0.916667	0.666667	0.0833333	0.0833333	0	0	0.884439	0.830435	0.95913	0.895294	0.615385	0.461538	0.846154	0.615385	0.477064	0.697987	0.530612	0.859504	0.3	0.214286	0.25	0.1
sub4	10	11	10	10	1	2	0	3	0.833333	0.916667	0.833333	0.833333	0.0833333	0.166667	0	0.25	0.909938	0.909938	0.938095	0.850877	0.692308	0.692308	0.769231	0.538462	0.292135	-0.292135	0.712329	-0.214876	0.375	0.625	0.166667	0.583333
sub5	9	5	11	9	0	1	0	1	0.75	0.416667	0.916667	0.75	0	0.0833333	0	0.0833333	0.916842	0.768775	0.95913	0.884439	0.692308	0.307692	0.846154	0.615385	0.804124	0.825397	0.530612	0.477064	0.125	0.166667	0.25	0.3
sub6	9	5	5	8	1	3	0	2	0.75	0.416667	0.416667	0.666667	0.0833333	0.25	0	0.166667	0.884439	0.643541	0.827273	0.819328	0.615385	0.153846	0.384615	0.461538	0.477064	0.574586	0.943005	0.379562	0.3	0.318182	0.0625	0.357143
sub7	3	7	7	5	1	2	0	1	0.25	0.583333	0.583333	0.416667	0.0833333	0.166667	0	0.0833333	0.686335	0.785714	0.873333	0.768775	0.153846	0.384615	0.538462	0.307692	0.908297	0.509804	0.896552	0.825397	0.136364	0.3125	0.0833333	0.166667
sub8	6	7	6	4	1	1	0	2	0.5	0.583333	0.5	0.333333	0.0833333	0.0833333	0	0.166667	0.801003	0.830435	0.850769	0.65873	0.384615	0.461538	0.461538	0.153846	0.769231	0.697987	0.923077	0.776119	0.1875	0.214286	0.0714286	0.227273
sub9	10	3	8	4	7	3	1	4	0.833333	0.25	0.666667	0.333333	0.583333	0.25	0.0833333	0.333333	0.707792	0.5	0.858056	0.5	0.230769	0	0.538462	0	-0.702703	0.760976	0.604651	0.562162	0.75	0.269231	0.25	0.346154
sub10	9	10	7	11	3	5	5	4	0.75	0.833333	0.583333	0.916667	0.25	0.416667	0.416667	0.333333	0.815789	0.785714	0.633333	0.858056	0.461538	0.384615	0.153846	0.538462	2.1161e-16	-0.509804	5.68569e-17	-0.604651	0.5	0.6875	0.5	0.75
sub11	11	9	8	5	2	3	3	5	0.916667	0.75	0.666667	0.416667	0.166667	0.25	0.25	0.416667	0.909938	0.815789	0.778638	0.5	0.692308	0.461538	0.384615	0	-0.292135	2.1161e-16	0.17931	0.300578	0.625	0.5	0.4375	0.423077
sub12	11	6	10	10	1	1	3	0	0.916667	0.5	0.833333	0.833333	0.0833333	0.0833333	0.25	0	0.934783	0.801003	0.850877	0.938095	0.769231	0.384615	0.538462	0.769231	6.7981e-17	0.769231	-0.214876	0.712329	0.5	0.1875	0.583333	0.166667
sub13	7	6	7	10	1	0	0	5	0.583333	0.5	0.583333	0.833333	0.0833333	0	0	0.416667	0.830435	0.850769	0.873333	0.785714	0.461538	0.461538	0.538462	0.384615	0.697987	0.923077	0.896552	-0.509804	0.214286	0.0714286	0.0833333	0.6875
sub14	4	5	5	8	0	1	0	0	0.333333	0.416667	0.416667	0.666667	0	0.0833333	0	0	0.802222	0.768775	0.827273	0.895294	0.307692	0.307692	0.384615	0.615385	0.958525	0.825397	0.943005	0.859504	0.0555556	0.166667	0.0625	0.1
sub15	10	5	6	8	3	2	2	1	0.833333	0.416667	0.5	0.666667	0.25	0.166667	0.166667	0.0833333	0.850877	0.707792	0.749084	0.858056	0.538462	0.230769	0.307692	0.538462	-0.214876	0.702703	0.615385	0.604651	0.583333	0.25	0.277778	0.25
sub16	10	11	11	11	4	8	3	5	0.833333	0.916667	0.916667	0.916667	0.333333	0.666667	0.25	0.416667	0.819328	0.731884	0.884439	0.830435	0.461538	0.230769	0.615385	0.461538	-0.379562	-0.870813	-0.477064	-0.697987	0.642857	0.85	0.7	0.785714
sub17	10	8	12	10	0	1	0	2	0.833333	0.666667	1	0.833333	0	0.0833333	0	0.166667	0.938095	0.858056	0.98	0.880952	0.769231	0.538462	0.923077	0.615385	0.712329	0.604651	-3.75255e-16	-8.93465e-17	0.166667	0.25	0.5	0.5
sub18	8	8	8	7	1	5	1	3	0.666667	0.666667	0.666667	0.583333	0.0833333	0.416667	0.0833333	0.25	0.858056	0.688235	0.858056	0.738596	0.538462	0.230769	0.538462	0.307692	0.604651	-0.161491	0.604651	0.33121	0.25	0.55	0.25	0.388889
sub19	11	7	10	5	0	1	0	1	0.916667	0.583333	0.833333	0.416667	0	0.0833333	0	0.0833333	0.95913	0.830435	0.938095	0.768775	0.846154	0.461538	0.769231	0.307692	0.530612	0.697987	0.712329	0.825397	0.25	0.214286	0.166667	0.166667
sub20	10	7	12	10	0	2	0	1	0.833333	0.583333	1	0.833333	0	0.166667	0	0.0833333	0.938095	0.785714	0.98	0.909938	0.769231	0.384615	0.923077	0.692308	0.712329	0.509804	-3.75255e-16	0.292135	0.166667	0.3125	0.5	0.375
sub21	10	10	12	10	0	0	0	0	0.833333	0.833333	1	0.833333	0	0	0	0	0.938095	0.938095	0.98	0.938095	0.769231	0.769231	0.923077	0.769231	0.712329	0.712329	-3.75255e-16	0.712329	0.166667	0.166667	0.5	0.166667
sub22	7	10	11	11	2	3	1	1	0.583333	0.833333	0.916667	0.916667	0.166667	0.25	0.0833333	0.0833333	0.785714	0.850877	0.934783	0.934783	0.384615	0.538462	0.769231	0.769231	0.509804	-0.214876	6.7981e-17	6.7981e-17	0.3125	0.583333	0.5	0.5
sub23	7	8	5	10	2	4	2	4	0.583333	0.666667	0.416667	0.833333	0.166667	0.333333	0.166667	0.333333	0.785714	0.735294	0.707792	0.819328	0.384615	0.307692	0.230769	0.461538	0.509804	0	0.702703	-0.379562	0.3125	0.5	0.25	0.642857
sub24	8	5	7	10	1	1	1	4	0.666667	0.416667	0.583333	0.833333	0.0833333	0.0833333	0.0833333	0.333333	0.858056	0.768775	0.830435	0.819328	0.538462	0.307692	0.461538	0.461538	0.604651	0.825397	0.697987	-0.379562	0.25	0.166667	0.214286	0.642857
sub25	8	8	6	10	1	6	1	6	0.666667	0.666667	0.5	0.833333	0.0833333	0.5	0.0833333	0.5	0.858056	0.635747	0.801003	0.749084	0.538462	0.153846	0.384615	0.307692	0.604651	-0.307692	0.769231	-0.615385	0.25	0.590909	0.1875	0.722222
sub26	9	6	7	7	3	2	0	2	0.75	0.5	0.583333	0.583333	0.25	0.166667	0	0.166667	0.815789	0.749084	0.873333	0.785714	0.461538	0.307692	0.538462	0.384615	2.1161e-16	0.615385	0.896552	0.509804	0.5	0.277778	0.0833333	0.3125
sub27	8	3	6	5	0	0	0	0	0.666667	0.25	0.5	0.416667	0	0	0	0	0.895294	0.774286	0.850769	0.827273	0.615385	0.230769	0.461538	0.384615	0.859504	0.970954	0.923077	0.943005	0.1	0.05	0.0714286	0.0625
sub28	11	8	11	7	1	1	0	0	0.916667	0.666667	0.916667	0.583333	0.0833333	0.0833333	0	0	0.934783	0.858056	0.95913	0.873333	0.769231	0.538462	0.846154	0.538462	6.7981e-17	0.604651	0.530612	0.896552	0.5	0.25	0.25	0.0833333
sub29	10	12	10	11	1	4	0	4	0.833333	1	0.833333	0.916667	0.0833333	0.333333	0	0.333333	0.909938	0.895294	0.938095	0.858056	0.692308	0.615385	0.769231	0.538462	0.292135	-0.859504	0.712329	-0.604651	0.375	0.9	0.166667	0.75
sub30	8	2	9	6	2	4	3	2	0.666667	0.166667	0.75	0.5	0.166667	0.333333	0.25	0.166667	0.819328	0.241176	0.815789	0.749084	0.461538	-0.153846	0.461538	0.307692	0.379562	0.776119	2.1161e-16	0.615385	0.357143	0.3	0.5	0.277778
sub31	6	9	5	8	1	6	0	5	0.5	0.75	0.416667	0.666667	0.0833333	0.5	0	0.416667	0.801003	0.694332	0.827273	0.688235	0.384615	0.230769	0.384615	0.230769	0.769231	-0.461538	0.943005	-0.161491	0.1875	0.65	0.0625	0.55
sub32	10	8	7	12	2	3	0	3	0.833333	0.666667	0.583333	1	0.166667	0.25	0	0.25	0.880952	0.778638	0.873333	0.916842	0.615385	0.384615	0.538462	0.692308	-8.93465e-17	0.17931	0.896552	-0.804124	0.5	0.4375	0.0833333	0.875
sub33	8	6	8	5	1	2	0	4	0.666667	0.5	0.666667	0.416667	0.0833333	0.166667	0	0.333333	0.858056	0.749084	0.895294	0.574866	0.538462	0.307692	0.615385	0.0769231	0.604651	0.615385	0.859504	0.440678	0.25	0.277778	0.1	0.375
sub34	7	5	11	11	0	1	0	0	0.583333	0.416667	0.916667	0.916667	0	0.0833333	0	0	0.873333	0.768775	0.95913	0.95913	0.538462	0.307692	0.846154	0.846154	0.896552	0.825397	0.530612	0.530612	0.0833333	0.166667	0.25	0.25
sub35	6	7	8	7	0	1	0	0	0.5	0.583333	0.666667	0.583333	0	0.0833333	0	0	0.850769	0.830435	0.895294	0.873333	0.461538	0.461538	0.615385	0.538462	0.923077	0.697987	0.859504	0.896552	0.0714286	0.214286	0.1	0.0833333
sub36	6	2	8	6	2	0	1	3	0.5	0.166667	0.666667	0.5	0.166667	0	0.0833333	0.25	0.749084	0.74	0.858056	0.694332	0.307692	0.153846	0.538462	0.230769	0.615385	0.981132	0.604651	0.461538	0.277778	0.0454545	0.25	0.35
sub37	6	8	5	7	1	7	3	6	0.5	0.666667	0.416667	0.583333	0.0833333	0.583333	0.25	0.5	0.801003	0.574866	0.643541	0.571795	0.384615	0.0769231	0.153846	0.0769231	0.769231	-0.440678	0.574586	-0.153846	0.1875	0.625	0.318182	0.541667
sub38	12	11	11	12	2	8	3	7	1	0.916667	0.916667	1	0.166667	0.666667	0.25	0.583333	0.938095	0.731884	0.884439	0.827273	0.769231	0.230769	0.615385	0.384615	-0.712329	-0.870813	-0.477064	-0.943005	0.833333	0.85	0.7	0.9375
sub39	12	7	11	10	3	1	1	2	1	0.583333	0.916667	0.833333	0.25	0.0833333	0.0833333	0.166667	0.916842	0.830435	0.934783	0.880952	0.692308	0.461538	0.769231	0.615385	-0.804124	0.697987	6.7981e-17	-8.93465e-17	0.875	0.214286	0.5	0.5
sub40	7	7	10	8	0	3	2	2	0.583333	0.583333	0.833333	0.666667	0	0.25	0.166667	0.166667	0.873333	0.738596	0.880952	0.819328	0.538462	0.307692	0.615385	0.461538	0.896552	0.33121	-8.93465e-17	0.379562	0.0833333	0.388889	0.5	0.357143
Mean									0.71875	0.6	0.7125	0.7	0.108333	0.20625	0.075	0.2	0.862722	0.765792	0.870958	0.808739	0.563462	0.363462	0.588462	0.461538	0.387452	0.361498	0.496216	0.228179	0.331698	0.352673	0.27789	0.404903
SD									0.178718	0.205168	0.190544	0.193189	0.116636	0.184888	0.108078	0.167519	0.0682208	0.125185	0.0838693	0.117552	0.177977	0.197071	0.209435	0.221031	0.486005	0.561016	0.417273	0.555884	0.212939	0.229181	0.188845	0.237707
SE									0.0282577	0.03244	0.0301276	0.0305458	0.0184418	0.0292334	0.0170887	0.0264871	0.0107867	0.0197935	0.0132609	0.0185866	0.0281406	0.0311597	0.0331145	0.034948	0.0768442	0.0887044	0.0659766	0.087893	0.0336685	0.0362368	0.029859	0.0375848
Experiment 1
subject	Hit_GSFF	Hit_GSHF	Hit_GSNF	Hit_PSFF	Hit_PSHF	Hit_PSNF	Hit_NSFF	Hit_NSHF	Hit_NSNF	FA_GSFF	FA_GSHF	FA_GSNF	FA_PSFF	FA_PSHF	FA_PSNF	FA_NSFF	FA_NSHF	FA_NSNF	HitRate_GSFF	HitRate_GSHF	HitRate_GSNF	HitRate_PSFF	HitRate_PSHF	HitRate_PSNF	HitRate_NSFF	HitRate_NSHF	HitRate_NSNF	FARate_GSFF	FARate_GSHF	FARate_GSNF	FARate_PSFF	FARate_PSHF	FARate_PSNF	FARate_NSFF	FARate_NSHF	FARate_NSNF	A'_GSFF	A'_GSHF	A'_GSNF	A'_PSFF	A'_PSHF	A'_PSNF	A'_NSFF	A'_NSHF	A'_NSNF	Pr_GSFF	Pr_GSHF	Pr_GSNF	Pr_PSFF
sub1	8	6	7	5	6	5	6	6	7	3	1	2	0	2	0	1	1	2	1	0.75	0.875	0.625	0.75	0.625	0.75	0.75	0.875	0.375	0.125	0.25	0	0.25	0	0.125	0.125	0.25	0.874332	0.858974	0.858974	0.874332	0.807692	0.874332	0.858974	0.858974	0.858974	0.555556	0.555556	0.555556	0.555556
sub2	6	6	7	8	6	6	8	8	7	5	6	4	3	3	3	4	7	3	0.75	0.75	0.875	1	0.75	0.75	1	1	0.875	0.625	0.75	0.5	0.375	0.375	0.375	0.5	0.875	0.375	0.60989	0.5	0.766667	0.874332	0.751748	0.751748	0.839869	0.696078	0.815152	0.111111	0	0.333333	0.555556
sub3	6	5	6	7	7	7	7	6	6	2	6	6	3	3	4	3	5	5	0.75	0.625	0.75	0.875	0.875	0.875	0.875	0.75	0.75	0.25	0.75	0.75	0.375	0.375	0.5	0.375	0.625	0.625	0.807692	0.354545	0.5	0.815152	0.815152	0.766667	0.815152	0.60989	0.60989	0.444444	-0.111111	0	0.444444
sub4	8	8	5	7	6	6	8	8	7	2	0	0	1	0	0	0	0	0	1	1	0.625	0.875	0.75	0.75	1	1	0.875	0.25	0	0	0.125	0	0	0	0	0	0.90724	0.970588	0.874332	0.9	0.90724	0.90724	0.970588	0.970588	0.939216	0.666667	0.888889	0.555556	0.666667
sub5	5	6	7	6	4	1	7	7	3	1	2	1	1	0	0	3	2	1	0.625	0.75	0.875	0.75	0.5	0.125	0.875	0.875	0.375	0.125	0.25	0.125	0.125	0	0	0.375	0.25	0.125	0.815152	0.807692	0.9	0.858974	0.839869	0.696078	0.815152	0.858974	0.709524	0.444444	0.444444	0.666667	0.555556
sub6	4	5	4	7	5	5	4	4	5	4	4	1	2	3	2	1	1	1	0.5	0.625	0.5	0.875	0.625	0.625	0.5	0.5	0.625	0.5	0.5	0.125	0.25	0.375	0.25	0.125	0.125	0.125	0.5	0.60101	0.766667	0.858974	0.681818	0.751748	0.766667	0.766667	0.815152	0	0.111111	0.333333	0.555556
sub7	7	7	5	7	6	7	5	6	5	0	0	2	0	1	0	0	0	1	0.875	0.875	0.625	0.875	0.75	0.875	0.625	0.75	0.625	0	0	0.25	0	0.125	0	0	0	0.125	0.939216	0.939216	0.751748	0.939216	0.858974	0.939216	0.874332	0.90724	0.815152	0.777778	0.777778	0.333333	0.777778
sub8	8	7	7	8	8	7	6	6	8	0	1	0	0	0	2	0	2	1	1	0.875	0.875	1	1	0.875	0.75	0.75	1	0	0.125	0	0	0	0.25	0	0.25	0.125	0.970588	0.9	0.939216	0.970588	0.970588	0.858974	0.90724	0.807692	0.939216	0.888889	0.666667	0.777778	0.888889
sub9	8	6	6	5	7	8	8	7	6	3	3	3	4	6	4	1	6	3	1	0.75	0.75	0.625	0.875	1	1	0.875	0.75	0.375	0.375	0.375	0.5	0.75	0.5	0.125	0.75	0.375	0.874332	0.751748	0.751748	0.60101	0.633333	0.839869	0.939216	0.633333	0.751748	0.555556	0.333333	0.333333	0.111111
sub10	3	6	6	7	4	7	7	5	7	3	4	3	0	0	2	0	2	1	0.375	0.75	0.75	0.875	0.5	0.875	0.875	0.625	0.875	0.375	0.5	0.375	0	0	0.25	0	0.25	0.125	0.5	0.688034	0.751748	0.939216	0.839869	0.858974	0.939216	0.751748	0.9	0	0.222222	0.333333	0.777778
sub11	4	6	3	4	6	3	7	5	4	3	5	4	4	2	2	1	4	3	0.5	0.75	0.375	0.5	0.75	0.375	0.875	0.625	0.5	0.375	0.625	0.5	0.5	0.25	0.25	0.125	0.5	0.375	0.60101	0.60989	0.373016	0.5	0.807692	0.60989	0.9	0.60101	0.60101	0.111111	0.111111	-0.111111	0
sub12	7	7	8	4	4	5	5	6	5	1	4	3	0	0	0	0	0	1	0.875	0.875	1	0.5	0.5	0.625	0.625	0.75	0.625	0.125	0.5	0.375	0	0	0	0	0	0.125	0.9	0.766667	0.874332	0.839869	0.839869	0.874332	0.874332	0.90724	0.815152	0.666667	0.333333	0.555556	0.444444
sub13	3	1	4	5	3	3	5	3	4	0	0	1	1	0	0	0	1	2	0.375	0.125	0.5	0.625	0.375	0.375	0.625	0.375	0.5	0	0	0.125	0.125	0	0	0	0.125	0.25	0.802521	0.696078	0.766667	0.815152	0.802521	0.802521	0.874332	0.709524	0.688034	0.333333	0.111111	0.333333	0.444444
sub14	8	7	7	8	6	8	8	6	5	4	2	0	2	3	1	2	2	2	1	0.875	0.875	1	0.75	1	1	0.75	0.625	0.5	0.25	0	0.25	0.375	0.125	0.25	0.25	0.25	0.839869	0.858974	0.939216	0.90724	0.751748	0.939216	0.90724	0.807692	0.751748	0.444444	0.555556	0.777778	0.666667
sub15	7	6	6	8	6	7	6	7	8	0	3	1	3	3	1	1	2	3	0.875	0.75	0.75	1	0.75	0.875	0.75	0.875	1	0	0.375	0.125	0.375	0.375	0.125	0.125	0.25	0.375	0.939216	0.751748	0.858974	0.874332	0.751748	0.9	0.858974	0.858974	0.874332	0.777778	0.333333	0.555556	0.555556
sub16	4	4	3	5	4	4	5	5	2	0	2	3	0	1	2	0	2	1	0.5	0.5	0.375	0.625	0.5	0.5	0.625	0.625	0.25	0	0.25	0.375	0	0.125	0.25	0	0.25	0.125	0.839869	0.688034	0.5	0.874332	0.766667	0.688034	0.874332	0.751748	0.633333	0.444444	0.222222	0	0.555556
sub17	6	4	6	6	7	5	6	4	4	2	2	0	2	4	4	4	2	1	0.75	0.5	0.75	0.75	0.875	0.625	0.75	0.5	0.5	0.25	0.25	0	0.25	0.5	0.5	0.5	0.25	0.125	0.807692	0.688034	0.90724	0.807692	0.766667	0.60101	0.688034	0.688034	0.766667	0.444444	0.222222	0.666667	0.444444
sub18	7	7	7	7	7	4	7	6	6	0	0	1	0	0	3	0	0	1	0.875	0.875	0.875	0.875	0.875	0.5	0.875	0.75	0.75	0	0	0.125	0	0	0.375	0	0	0.125	0.939216	0.939216	0.9	0.939216	0.939216	0.60101	0.939216	0.90724	0.858974	0.777778	0.777778	0.666667	0.777778
sub19	8	7	6	8	8	8	8	7	7	1	0	0	0	1	0	0	0	1	1	0.875	0.75	1	1	1	1	0.875	0.875	0.125	0	0	0	0.125	0	0	0	0.125	0.939216	0.939216	0.90724	0.970588	0.939216	0.970588	0.970588	0.939216	0.9	0.777778	0.777778	0.666667	0.888889
sub20	6	8	6	4	6	4	6	6	5	2	3	1	1	4	3	0	0	1	0.75	1	0.75	0.5	0.75	0.5	0.75	0.75	0.625	0.25	0.375	0.125	0.125	0.5	0.375	0	0	0.125	0.807692	0.874332	0.858974	0.766667	0.688034	0.60101	0.90724	0.90724	0.815152	0.444444	0.555556	0.555556	0.333333
sub21	7	4	7	6	6	5	6	3	5	1	0	0	2	0	0	1	0	0	0.875	0.5	0.875	0.75	0.75	0.625	0.75	0.375	0.625	0.125	0	0	0.25	0	0	0.125	0	0	0.9	0.839869	0.939216	0.807692	0.90724	0.874332	0.858974	0.802521	0.874332	0.666667	0.444444	0.777778	0.444444
sub22	7	7	8	8	8	7	7	7	8	0	0	1	1	3	1	0	1	0	0.875	0.875	1	1	1	0.875	0.875	0.875	1	0	0	0.125	0.125	0.375	0.125	0	0.125	0	0.939216	0.939216	0.939216	0.939216	0.874332	0.9	0.939216	0.9	0.970588	0.777778	0.777778	0.777778	0.777778
sub23	7	7	7	7	6	6	7	8	8	1	5	4	0	5	1	2	0	3	0.875	0.875	0.875	0.875	0.75	0.75	0.875	1	1	0.125	0.625	0.5	0	0.625	0.125	0.25	0	0.375	0.9	0.709524	0.766667	0.939216	0.60989	0.858974	0.858974	0.970588	0.874332	0.666667	0.222222	0.333333	0.777778
sub24	8	8	8	5	8	6	5	7	7	2	2	2	0	0	2	1	3	1	1	1	1	0.625	1	0.75	0.625	0.875	0.875	0.25	0.25	0.25	0	0	0.25	0.125	0.375	0.125	0.90724	0.90724	0.90724	0.874332	0.970588	0.807692	0.815152	0.815152	0.9	0.666667	0.666667	0.666667	0.555556
sub25	8	8	7	8	8	8	8	8	8	2	5	2	3	2	1	0	3	1	1	1	0.875	1	1	1	1	1	1	0.25	0.625	0.25	0.375	0.25	0.125	0	0.375	0.125	0.90724	0.802521	0.858974	0.874332	0.90724	0.939216	0.970588	0.874332	0.939216	0.666667	0.333333	0.555556	0.555556
sub26	5	5	5	8	7	7	6	8	6	0	2	1	2	4	1	0	1	0	0.625	0.625	0.625	1	0.875	0.875	0.75	1	0.75	0	0.25	0.125	0.25	0.5	0.125	0	0.125	0	0.874332	0.751748	0.815152	0.90724	0.766667	0.9	0.90724	0.939216	0.90724	0.555556	0.333333	0.444444	0.666667
sub27	5	6	7	6	5	6	8	6	7	3	1	3	2	3	3	0	4	3	0.625	0.75	0.875	0.75	0.625	0.75	1	0.75	0.875	0.375	0.125	0.375	0.25	0.375	0.375	0	0.5	0.375	0.681818	0.858974	0.815152	0.807692	0.681818	0.751748	0.970588	0.688034	0.815152	0.222222	0.555556	0.444444	0.444444
sub28	4	2	4	6	6	6	6	4	5	1	0	3	1	1	0	1	0	1	0.5	0.25	0.5	0.75	0.75	0.75	0.75	0.5	0.625	0.125	0	0.375	0.125	0.125	0	0.125	0	0.125	0.766667	0.758824	0.60101	0.858974	0.858974	0.90724	0.858974	0.839869	0.815152	0.333333	0.222222	0.111111	0.555556
sub29	8	6	8	7	7	7	8	8	8	2	3	3	3	0	0	3	4	0	1	0.75	1	0.875	0.875	0.875	1	1	1	0.25	0.375	0.375	0.375	0	0	0.375	0.5	0	0.90724	0.751748	0.874332	0.815152	0.939216	0.939216	0.874332	0.839869	0.970588	0.666667	0.333333	0.555556	0.444444
sub30	5	6	5	5	6	8	5	8	6	0	1	0	0	1	0	1	0	0	0.625	0.75	0.625	0.625	0.75	1	0.625	1	0.75	0	0.125	0	0	0.125	0	0.125	0	0	0.874332	0.858974	0.874332	0.874332	0.858974	0.970588	0.815152	0.970588	0.90724	0.555556	0.555556	0.555556	0.555556
sub31	7	8	8	7	8	6	8	8	8	2	0	1	2	2	0	0	0	0	0.875	1	1	0.875	1	0.75	1	1	1	0.25	0	0.125	0.25	0.25	0	0	0	0	0.858974	0.970588	0.939216	0.858974	0.90724	0.90724	0.970588	0.970588	0.970588	0.555556	0.888889	0.777778	0.555556
sub32	6	6	8	6	6	7	7	6	8	2	3	0	0	2	3	0	3	2	0.75	0.75	1	0.75	0.75	0.875	0.875	0.75	1	0.25	0.375	0	0	0.25	0.375	0	0.375	0.25	0.807692	0.751748	0.970588	0.90724	0.807692	0.815152	0.939216	0.751748	0.90724	0.444444	0.333333	0.888889	0.666667
sub33	6	7	7	7	6	4	7	6	7	0	2	2	0	0	1	0	3	0	0.75	0.875	0.875	0.875	0.75	0.5	0.875	0.75	0.875	0	0.25	0.25	0	0	0.125	0	0.375	0	0.90724	0.858974	0.858974	0.939216	0.90724	0.766667	0.939216	0.751748	0.939216	0.666667	0.555556	0.555556	0.777778
sub34	8	7	8	7	7	8	7	8	8	0	0	0	0	1	1	0	0	0	1	0.875	1	0.875	0.875	1	0.875	1	1	0	0	0	0	0.125	0.125	0	0	0	0.970588	0.939216	0.970588	0.939216	0.9	0.939216	0.939216	0.970588	0.970588	0.888889	0.777778	0.888889	0.777778
sub35	6	6	3	8	5	4	8	8	7	0	0	0	0	0	0	0	0	0	0.75	0.75	0.375	1	0.625	0.5	1	1	0.875	0	0	0	0	0	0	0	0	0	0.90724	0.90724	0.802521	0.970588	0.874332	0.839869	0.970588	0.970588	0.939216	0.666667	0.666667	0.333333	0.888889
sub36	5	7	5	6	7	5	4	6	7	1	4	0	1	2	3	1	3	1	0.625	0.875	0.625	0.75	0.875	0.625	0.5	0.75	0.875	0.125	0.5	0	0.125	0.25	0.375	0.125	0.375	0.125	0.815152	0.766667	0.874332	0.858974	0.858974	0.681818	0.766667	0.751748	0.9	0.444444	0.333333	0.555556	0.555556
sub37	2	5	4	6	7	6	3	5	6	0	1	1	0	1	2	0	0	1	0.25	0.625	0.5	0.75	0.875	0.75	0.375	0.625	0.75	0	0.125	0.125	0	0.125	0.25	0	0	0.125	0.758824	0.815152	0.766667	0.90724	0.9	0.807692	0.802521	0.874332	0.858974	0.222222	0.444444	0.333333	0.666667
sub38	6	8	7	7	4	4	6	7	6	1	3	1	4	5	4	0	3	3	0.75	1	0.875	0.875	0.5	0.5	0.75	0.875	0.75	0.125	0.375	0.125	0.5	0.625	0.5	0	0.375	0.375	0.858974	0.874332	0.9	0.766667	0.373016	0.5	0.90724	0.815152	0.751748	0.555556	0.555556	0.666667	0.333333
sub39	7	6	6	5	7	6	8	5	7	3	1	0	1	0	1	0	0	1	0.875	0.75	0.75	0.625	0.875	0.75	1	0.625	0.875	0.375	0.125	0	0.125	0	0.125	0	0	0.125	0.815152	0.858974	0.90724	0.815152	0.939216	0.858974	0.970588	0.874332	0.9	0.444444	0.555556	0.666667	0.444444
sub40	8	5	5	6	7	6	8	8	7	2	1	0	0	0	0	0	1	0	1	0.625	0.625	0.75	0.875	0.75	1	1	0.875	0.25	0.125	0	0	0	0	0	0.125	0	0.90724	0.815152	0.874332	0.90724	0.939216	0.90724	0.970588	0.939216	0.939216	0.666667	0.444444	0.555556	0.666667
Mean																			0.775	0.759375	0.759375	0.803125	0.771875	0.725	0.815625	0.7875	0.78125	0.184375	0.25625	0.1875	0.153125	0.2125	0.178125	0.096875	0.2125	0.159375	0.836998	0.798017	0.825063	0.862389	0.823538	0.817633	0.889158	0.831233	0.847726	0.525	0.447222	0.508333	0.577778
SD																			0.206466	0.192794	0.188592	0.154752	0.162333	0.204516	0.167436	0.181694	0.18936	0.169812	0.229879	0.187767	0.166235	0.212208	0.171922	0.145684	0.228569	0.149753	0.115085	0.129921	0.131211	0.0913355	0.117409	0.118119	0.0679925	0.106317	0.0996183	0.226438	0.247159	0.237225	0.191956
SE																			0.0326451	0.0304834	0.029819	0.0244685	0.0256672	0.0323369	0.026474	0.0287284	0.0299405	0.0268496	0.0363471	0.0296886	0.0262841	0.033553	0.0271833	0.0230347	0.0361399	0.023678	0.0181965	0.0205424	0.0207463	0.0144414	0.0185641	0.0186763	0.0107506	0.0168102	0.015751	0.035803	0.0390792	0.0375086	0.0303509
Experiment 2
subject	Hit_GS	Hit_PS	FA_GS	FA_PS	HitRate_GS	HitRate_PS	FARate_GS	FARate_PS	A'_GS	A'_PS	Pr_GS	Pr_PS	BD''_GS	BD''_PS	Br_GS	Br_PS
sub1	20	20	3	1	0.833333	0.833333	0.125	0.0416667	0.904991	0.933835	0.68	0.76	0.148368	0.549451	0.4375	0.25
sub2	14	11	3	1	0.583333	0.458333	0.125	0.0416667	0.817562	0.823774	0.44	0.4	0.632911	0.896861	0.25	0.1
sub3	16	16	0	1	0.666667	0.666667	0	0.0416667	0.90569	0.886847	0.64	0.6	0.923788	0.77951	0.0555556	0.15
sub4	11	13	3	0	0.458333	0.541667	0.125	0	0.766936	0.873394	0.32	0.52	0.75643	0.953206	0.205882	0.0416667
sub5	17	19	1	3	0.708333	0.791667	0.0416667	0.125	0.898784	0.891175	0.64	0.64	0.740741	0.268097	0.166667	0.388889
sub6	18	19	2	1	0.75	0.791667	0.0833333	0.0416667	0.893994	0.922259	0.64	0.72	0.519481	0.630915	0.277778	0.214286
sub7	10	15	4	3	0.416667	0.625	0.166667	0.125	0.716028	0.833083	0.24	0.48	0.725689	0.580271	0.236842	0.269231
sub8	15	11	5	1	0.625	0.458333	0.208333	0.0416667	0.789495	0.823774	0.4	0.4	0.369686	0.896861	0.366667	0.1
sub9	21	19	2	3	0.875	0.791667	0.0833333	0.125	0.932041	0.891175	0.76	0.64	0.188679	0.268097	0.416667	0.388889
sub10	19	18	0	0	0.791667	0.75	0	0	0.937467	0.926917	0.76	0.72	0.865052	0.890208	0.0833333	0.0714286
sub11	17	16	1	0	0.708333	0.666667	0.0416667	0	0.898784	0.90569	0.64	0.64	0.740741	0.923788	0.166667	0.0555556
sub12	22	15	10	6	0.916667	0.625	0.416667	0.25	0.84023	0.766783	0.48	0.36	-0.733945	0.271248	0.807692	0.40625
sub13	14	15	0	2	0.583333	0.625	0	0.0833333	0.884236	0.854122	0.56	0.52	0.94518	0.693069	0.0454545	0.208333
sub14	10	9	2	2	0.416667	0.375	0.0833333	0.0833333	0.779365	0.761988	0.32	0.28	0.851064	0.872483	0.147059	0.138889
sub15	21	22	2	1	0.875	0.916667	0.0833333	0.0416667	0.932041	0.956738	0.76	0.84	0.188679	0.27027	0.416667	0.375
sub16	16	12	1	0	0.666667	0.5	0.0416667	0	0.886847	0.862449	0.6	0.48	0.77951	0.96	0.15	0.0384615
sub17	19	20	3	2	0.791667	0.833333	0.125	0.0833333	0.891175	0.919512	0.64	0.72	0.268097	0.327869	0.388889	0.357143
sub18	11	14	5	4	0.458333	0.583333	0.208333	0.166667	0.707358	0.794365	0.24	0.4	0.612557	0.534759	0.289474	0.3
sub19	17	20	0	3	0.708333	0.833333	0	0.125	0.916327	0.904991	0.68	0.68	0.909091	0.148368	0.0625	0.4375
sub20	9	11	6	4	0.375	0.458333	0.25	0.166667	0.619488	0.73754	0.12	0.28	0.645624	0.684932	0.295455	0.25
sub21	19	21	0	1	0.791667	0.875	0	0.0416667	0.937467	0.945324	0.76	0.8	0.865052	0.436681	0.0833333	0.3
sub22	20	18	0	1	0.833333	0.75	0	0.0416667	0.947984	0.910581	0.8	0.68	0.829876	0.692521	0.1	0.1875
sub23	19	15	4	2	0.791667	0.625	0.166667	0.0833333	0.875235	0.854122	0.6	0.52	0.124688	0.693069	0.45	0.208333
sub24	11	10	3	4	0.458333	0.416667	0.125	0.166667	0.766936	0.716028	0.32	0.24	0.75643	0.725689	0.205882	0.236842
sub25	14	13	5	2	0.583333	0.541667	0.208333	0.0833333	0.770557	0.825926	0.36	0.44	0.439367	0.769231	0.34375	0.178571
sub26	9	11	6	2	0.375	0.458333	0.25	0.0833333	0.619488	0.795652	0.12	0.36	0.645624	0.827068	0.295455	0.15625
sub27	20	21	2	0	0.833333	0.875	0.0833333	0	0.919512	0.958472	0.72	0.84	0.327869	0.777202	0.357143	0.125
sub28	22	22	0	1	0.916667	0.916667	0	0.0416667	0.968934	0.956738	0.88	0.84	0.689655	0.27027	0.166667	0.375
sub29	20	16	1	3	0.833333	0.666667	0.0416667	0.125	0.933835	0.848132	0.76	0.52	0.549451	0.519751	0.25	0.291667
sub30	18	16	3	5	0.75	0.666667	0.125	0.208333	0.877121	0.807692	0.6	0.44	0.366748	0.292398	0.35	0.392857
sub31	19	17	4	3	0.791667	0.708333	0.166667	0.125	0.875235	0.862791	0.6	0.56	0.124688	0.449438	0.45	0.318182
sub32	13	18	3	0	0.541667	0.75	0.125	0	0.801464	0.926917	0.4	0.72	0.679117	0.890208	0.233333	0.0714286
sub33	20	23	4	2	0.833333	0.958333	0.166667	0.0833333	0.890244	0.956738	0.64	0.84	2.82069e-16	-0.27027	0.5	0.625
sub34	17	20	4	3	0.708333	0.833333	0.166667	0.125	0.844251	0.904991	0.52	0.68	0.322581	0.148368	0.375	0.4375
sub35	16	19	3	5	0.666667	0.791667	0.125	0.208333	0.848132	0.858974	0.52	0.56	0.519751	-8.08729e-17	0.291667	0.5
sub36	21	21	1	1	0.875	0.875	0.0416667	0.0416667	0.945324	0.945324	0.8	0.8	0.436681	0.436681	0.3	0.3
sub37	21	23	3	7	0.875	0.958333	0.125	0.291667	0.918605	0.898784	0.72	0.64	0	-0.740741	0.5	0.833333
sub38	13	17	2	1	0.541667	0.708333	0.0833333	0.0416667	0.825926	0.898784	0.44	0.64	0.769231	0.740741	0.178571	0.166667
sub39	21	24	3	1	0.875	1	0.125	0.0416667	0.918605	0.979375	0.72	0.92	0	-0.515464	0.5	0.75
sub40	20	16	2	1	0.833333	0.666667	0.0833333	0.0416667	0.919512	0.886847	0.72	0.6	0.327869	0.77951	0.357143	0.15
sub41	21	20	0	0	0.875	0.833333	0	0	0.958472	0.947984	0.84	0.8	0.777202	0.829876	0.125	0.1
sub42	14	12	6	5	0.583333	0.5	0.25	0.208333	0.746039	0.729744	0.32	0.28	0.34662	0.56	0.382353	0.305556
sub43	14	18	4	2	0.583333	0.75	0.166667	0.0833333	0.794365	0.893994	0.4	0.64	0.534759	0.519481	0.3	0.277778
sub44	18	17	3	7	0.75	0.708333	0.125	0.291667	0.877121	0.785714	0.6	0.4	0.366748	6.60847e-17	0.35	0.5
sub45	13	19	0	0	0.541667	0.791667	0	0	0.873394	0.937467	0.52	0.76	0.953206	0.865052	0.0416667	0.0833333
sub46	22	20	1	2	0.916667	0.833333	0.0416667	0.0833333	0.956738	0.919512	0.84	0.72	0.27027	0.327869	0.375	0.357143
sub47	15	19	5	8	0.625	0.791667	0.208333	0.333333	0.789495	0.807692	0.4	0.44	0.369686	-0.292398	0.366667	0.607143
sub48	21	21	5	7	0.875	0.875	0.208333	0.291667	0.891175	0.862791	0.64	0.56	-0.268097	-0.449438	0.611111	0.681818
sub49	9	12	3	0	0.375	0.5	0.125	0	0.727662	0.862449	0.24	0.48	0.818554	0.96	0.184211	0.0384615
sub50	15	21	3	4	0.625	0.875	0.125	0.166667	0.833083	0.904991	0.48	0.68	0.580271	-0.148368	0.269231	0.5625
sub51	15	17	7	4	0.625	0.708333	0.291667	0.166667	0.743318	0.844251	0.32	0.52	0.176991	0.322581	0.441176	0.375
sub52	22	19	1	2	0.916667	0.791667	0.0416667	0.0833333	0.956738	0.906838	0.84	0.68	0.27027	0.434783	0.375	0.3125
sub53	19	20	1	3	0.791667	0.833333	0.0416667	0.125	0.922259	0.904991	0.72	0.68	0.630915	0.148368	0.214286	0.4375
sub54	18	22	1	1	0.75	0.916667	0.0416667	0.0416667	0.910581	0.956738	0.68	0.84	0.692521	0.27027	0.1875	0.375
sub55	4	6	4	2	0.166667	0.25	0.166667	0.0833333	0.5	0.698291	0	0.16	0.908059	0.924855	0.18	0.119048
sub56	15	13	10	4	0.625	0.541667	0.416667	0.166667	0.666852	0.776423	0.2	0.36	-0.0831947	0.590219	0.525	0.28125
sub57	15	18	2	1	0.625	0.75	0.0833333	0.0416667	0.854122	0.910581	0.52	0.68	0.693069	0.692521	0.208333	0.1875
sub58	18	23	1	0	0.75	0.958333	0.0416667	0	0.910581	0.979375	0.68	0.92	0.692521	0.515464	0.1875	0.25
sub59	18	11	4	5	0.75	0.458333	0.166667	0.208333	0.859921	0.707358	0.56	0.24	0.230947	0.612557	0.409091	0.289474
sub60	19	17	0	2	0.791667	0.708333	0	0.0833333	0.937467	0.880952	0.76	0.6	0.865052	0.588235	0.0833333	0.25
sub61	21	18	10	5	0.875	0.75	0.416667	0.208333	0.817562	0.842342	0.44	0.52	-0.632911	0.109409	0.75	0.458333
sub62	15	18	1	0	0.625	0.75	0.0416667	0	0.874743	0.926917	0.56	0.72	0.811359	0.890208	0.136364	0.0714286
sub63	20	14	2	1	0.833333	0.583333	0.0833333	0.0416667	0.919512	0.862436	0.72	0.52	0.327869	0.837989	0.357143	0.125
sub64	14	16	4	5	0.583333	0.666667	0.166667	0.208333	0.794365	0.807692	0.4	0.44	0.534759	0.292398	0.3	0.392857
sub65	21	20	8	2	0.875	0.833333	0.333333	0.0833333	0.848132	0.919512	0.52	0.72	-0.519751	0.327869	0.708333	0.357143
sub66	20	14	4	7	0.833333	0.583333	0.166667	0.291667	0.890244	0.72069	0.64	0.28	2.82069e-16	0.25641	0.5	0.416667
sub67	13	15	0	0	0.541667	0.625	0	0	0.873394	0.894997	0.52	0.6	0.953206	0.935551	0.0416667	0.05
sub68	8	10	0	1	0.333333	0.416667	0	0.0416667	0.816927	0.81003	0.32	0.36	0.979192	0.911641	0.0294118	0.09375
sub69	15	15	8	8	0.625	0.625	0.333333	0.333333	0.718964	0.718964	0.28	0.28	0.0866551	0.0866551	0.472222	0.472222
sub70	15	18	1	2	0.625	0.75	0.0416667	0.0833333	0.874743	0.893994	0.56	0.64	0.811359	0.519481	0.136364	0.277778
sub71	18	20	2	2	0.75	0.833333	0.0833333	0.0833333	0.893994	0.919512	0.64	0.72	0.519481	0.327869	0.277778	0.357143
sub72	20	21	0	0	0.833333	0.875	0	0	0.947984	0.958472	0.8	0.84	0.829876	0.777202	0.1	0.125
sub73	11	13	3	0	0.458333	0.541667	0.125	0	0.766936	0.873394	0.32	0.52	0.75643	0.953206	0.205882	0.0416667
sub74	12	10	5	6	0.5	0.416667	0.208333	0.25	0.729744	0.649292	0.28	0.16	0.56	0.594354	0.305556	0.309524
sub75	17	14	2	1	0.708333	0.583333	0.0833333	0.0416667	0.880952	0.862436	0.6	0.52	0.588235	0.837989	0.25	0.125
sub76	8	10	1	1	0.333333	0.416667	0.0416667	0.0416667	0.78035	0.81003	0.28	0.36	0.93633	0.911641	0.0833333	0.09375
sub77	12	8	1	4	0.5	0.333333	0.0416667	0.166667	0.837021	0.666428	0.44	0.16	0.88	0.796813	0.107143	0.214286
sub78	15	15	0	0	0.625	0.625	0	0	0.894997	0.894997	0.6	0.6	0.935551	0.935551	0.05	0.05
sub79	9	10	0	0	0.375	0.416667	0	0	0.828679	0.840136	0.36	0.4	0.975293	0.970874	0.03125	0.0333333
sub80	3	13	1	1	0.125	0.541667	0.0416667	0.0416667	0.664134	0.849882	0.08	0.48	0.979432	0.860585	0.0652174	0.115385
sub81	13	17	6	4	0.541667	0.708333	0.25	0.166667	0.724224	0.844251	0.28	0.52	0.415973	0.322581	0.361111	0.375
sub82	12	13	0	1	0.5	0.541667	0	0.0416667	0.862449	0.849882	0.48	0.48	0.96	0.860585	0.0384615	0.115385
sub83	19	17	5	5	0.791667	0.708333	0.208333	0.208333	0.858974	0.825275	0.56	0.48	-8.08729e-17	0.206186	0.5	0.423077
sub84	20	18	2	4	0.833333	0.75	0.0833333	0.166667	0.919512	0.859921	0.72	0.56	0.327869	0.230947	0.357143	0.409091
sub85	17	11	4	3	0.708333	0.458333	0.166667	0.125	0.844251	0.766936	0.52	0.32	0.322581	0.75643	0.375	0.205882
sub86	21	15	5	2	0.875	0.625	0.208333	0.0833333	0.891175	0.854122	0.64	0.52	-0.268097	0.693069	0.611111	0.208333
sub87	12	12	5	4	0.5	0.5	0.208333	0.166667	0.729744	0.757561	0.28	0.32	0.56	0.64	0.305556	0.264706
sub88	10	17	5	4	0.416667	0.708333	0.208333	0.166667	0.68315	0.844251	0.2	0.52	0.660793	0.322581	0.275	0.375
sub89	16	14	1	3	0.666667	0.583333	0.0416667	0.125	0.886847	0.817562	0.6	0.44	0.77951	0.632911	0.15	0.25
sub90	17	15	3	0	0.708333	0.625	0.125	0	0.862791	0.894997	0.56	0.6	0.449438	0.935551	0.318182	0.05
sub91	13	9	3	10	0.541667	0.375	0.125	0.416667	0.801464	0.456443	0.4	-0.04	0.679117	0.385208	0.233333	0.403846
sub92	12	20	6	1	0.5	0.833333	0.25	0.0416667	0.701081	0.933835	0.24	0.76	0.48	0.549451	0.342105	0.25
sub93	11	6	7	0	0.458333	0.25	0.291667	0	0.644099	0.791994	0.16	0.24	0.465116	0.985761	0.357143	0.0263158
sub94	17	15	5	7	0.708333	0.625	0.208333	0.291667	0.825275	0.743318	0.48	0.32	0.206186	0.176991	0.423077	0.441176
sub95	19	17	2	4	0.791667	0.708333	0.0833333	0.166667	0.906838	0.844251	0.68	0.52	0.434783	0.322581	0.3125	0.375
sub96	15	13	4	4	0.625	0.541667	0.166667	0.166667	0.811566	0.776423	0.44	0.36	0.47259	0.590219	0.321429	0.28125
sub97	1	3	0	2	0.0416667	0.125	0	0.0833333	0.676871	0.58254	0.04	0.04	0.997398	0.964467	0.0208333	0.104167
sub98	11	15	9	6	0.458333	0.625	0.375	0.25	0.575736	0.766783	0.08	0.36	0.313972	0.271248	0.413043	0.40625
sub99	11	16	2	1	0.458333	0.666667	0.0833333	0.0416667	0.795652	0.886847	0.36	0.6	0.827068	0.77951	0.15625	0.15
sub100	18	13	6	8	0.75	0.541667	0.25	0.333333	0.824324	0.66835	0.48	0.2	0	0.246305	0.5	0.425
sub101	18	19	3	5	0.75	0.791667	0.125	0.208333	0.877121	0.858974	0.6	0.56	0.366748	-8.08729e-17	0.35	0.5
sub102	18	22	0	0	0.75	0.916667	0	0	0.926917	0.968934	0.72	0.88	0.890208	0.689655	0.0714286	0.166667
Mean					0.65482	0.66585	0.123775	0.10866	0.836432	0.848454	0.509804	0.534902	0.503256	0.522456	0.285015	0.273756
SD					0.184892	0.176385	0.10281	0.096372	0.0938834	0.089042	0.206177	0.200824	0.36586	0.362104	0.166148	0.168102
SE					0.0183071	0.0174648	0.0101797	0.00954225	0.00929584	0.00881647	0.0204145	0.0198845	0.0362255	0.0358537	0.0164511	0.0166445
[truncated: 23 more columns]

## Sheet: gaze tracking
Note: Replace Error Number of Ln(MFD) and Ln(MTVT) with Means
Experiment b
subject	NF_GSFF	NF_GSHF	NF_PSFF	NF_PSHF	ln(MFD_GSFF)	ln(MFD_GSHF)	ln(MFD_PSFF)	ln(MFD_PSHF)	ln(MTVT_GSFF)	ln(MTVT_GSHF)	ln(MTVT_PSFF)	ln(MTVT_PSHF)	Speed_GSFF	Speed_GSHF	Speed_PSFF	Speed_PSHF	Area_GSFF	Area_GSHF	Area_PSFFNF	Area_PSHF
sub1	3.83333	3.83333	5.16667	3.33333	5.03143	5.13208	5.06484	5.08327	7.2134	7.15962	7.36402	7.05503	95.8871	48.6866	80.3899	34.8296	0.25	0.666667	0.666667	0.333333
sub2	6.58333	7.25	6.25	4.83333	5.2921	5.34541	5.37274	5.18014	7.70901	7.74594	7.51162	7.33672	81.3945	71.0871	68.283	79.6448	2.33333	3.16667	3	1.58333
sub3	18.6667	15.9167	8.66667	11.75	5.58977	5.57176	5.37968	5.24676	8.67266	8.49404	7.97516	8.17618	291.79	79.0967	129.879	118.778	12.5833	11	3.08333	4
sub4	10.8333	10.75	16	11.5	5.37492	5.38011	5.49619	5.5275	8.22457	8.12071	8.50798	8.22094	99.5131	77.8766	102.236	103.228	4.16667	4.91667	8.41667	7
sub5	19.6667	20.8333	18.6667	20.9167	5.53947	5.66082	5.76578	5.57507	8.69558	8.8692	8.86743	8.83689	65.0062	126.49	154.57	88.9247	12.6667	14.4167	11.5833	11.1667
sub6	7.66667	9.66667	10.1667	14	5.25244	5.26345	5.12621	5.14729	7.71865	7.88674	8.04173	8.32051	91.9727	43.3708	103.745	111.87	3.16667	3.41667	2.58333	3.83333
sub7	4.66667	8.41667	2.75	4	5.1505	5.14951	5.06029	5.10468	7.38363	7.87452	7.1613	7.45694	51.967	105.527	80.2313	83.435	0.833333	1.41667	0.333333	0.416667
sub8	16	15.4167	17.75	16.0833	5.57079	5.58883	5.5601	5.58242	8.54172	8.54177	8.64159	8.58042	99.9414	178.201	166.126	136.959	9.5	11.8333	10	9.5
sub9	15.75	16.6667	10.4167	17.75	5.35496	5.38907	5.27885	5.38961	8.47125	8.47448	8.02429	8.56401	154.499	140.597	129.879	132.712	6.25	8.08333	3.41667	8.66667
sub10	8.83333	5.41667	9.16667	7.33333	5.23463	5.13806	5.3038	5.33688	7.87131	7.44024	8.07426	7.85758	97.7701	101.196	91.2292	87.5671	2.25	1.5	2.16667	1.91667
sub11	11.1667	10.1667	12.5	11.0833	5.47846	5.50042	5.43142	5.46911	8.18839	8.12225	8.22791	8.15704	127.947	86.1203	80.7037	75.4378	4.25	4	4.75	5.25
sub12	19.75	24	29.3333	38.5	5.58552	5.59686	5.37243	5.37364	8.82253	9.01621	9.18053	9.41408	294.176	190.321	192.956	164.013	13.1667	14.5	9.66667	15
sub13	10.25	9.83333	11.5	14.25	5.42949	5.35475	5.411	5.44913	8.03455	8.0768	8.15627	8.42081	81.8248	88.661	92.4174	91.4621	6.08333	5	5.58333	8.33333
sub14	14.5	19.1667	15.0833	12.1667	5.55583	5.56756	5.53575	5.47664	8.45585	8.71501	8.5749	8.27321	98.7153	115	130.169	83.4334	7	8.66667	6.41667	5.08333
sub15	9.58333	10.3333	7.5	8.33333	5.47937	5.64496	5.39029	5.53133	8.05555	8.19513	7.77968	8.04155	66.1809	51.5028	77.558	69.3705	4.41667	6.41667	3.25	4.83333
sub16	7.41667	8.08333	7.41667	8.41667	5.19452	5.31153	5.08607	5.24812	7.61993	7.90612	7.76896	7.98375	72.8963	86.1443	103.631	135.017	1.91667	3.66667	1.25	2
sub17	6	6.5	8.16667	10.9167	5.16819	5.21577	5.27159	5.21908	7.55145	7.71765	7.8293	7.98563	83.4743	100.477	77.5926	151.348	1.33333	2.41667	3.58333	3.33333
sub18	11.4167	15.9167	15.5833	12.75	5.44441	5.61614	5.5647	5.42745	8.06346	8.51451	8.50076	8.23038	115.184	93.1887	197.908	107.075	5.41667	10.3333	9.41667	5.33333
sub19	7.66667	12.9167	15.0833	18	5.31272	5.45168	5.46636	5.5258	7.70504	8.25933	8.43209	8.65968	54.9534	145.284	93.8544	88.5246	4.08333	7.5	9.25	11.3333
sub20	7.75	7.91667	7	6.83333	5.25255	5.40882	5.37451	5.30233	7.65187	7.76387	7.62848	7.56877	95.0445	83.6719	89.1373	72.1974	2.25	3.33333	3	1.91667
sub21	9.41667	12.0833	4.25	4.5	5.43927	5.39782	5.27681	5.19655	8.09557	8.22847	7.44935	7.33591	116.431	91.0742	77.0147	77.1138	3.33333	5.16667	1.16667	1.33333
sub22	9.83333	9.41667	7.91667	7.25	5.23491	5.25362	5.20845	5.33765	7.93993	7.92163	7.72198	7.73237	93.3939	77.8376	87.0343	89.9504	2.41667	2.66667	1.25	2.41667
sub23	9.16667	8.58333	7.08333	8.25	5.27118	5.28625	5.06624	5.22662	8.00634	7.8148	7.67875	7.91471	65.8968	45.6373	50.7501	62.5429	2.75	4.58333	1.66667	3.16667
sub24	6.25	6	4.58333	4.83333	5.29571	5.36546	5.35453	5.18362	7.4936	7.59262	7.20086	7.33335	68.9377	66.3874	98.5899	71.3317	3.66667	3.5	2	1.75
sub25	13.0833	14.4167	8.66667	9.58333	5.43672	5.39202	5.36197	5.38987	8.24067	8.34698	7.82857	7.96346	85.3348	67.9097	73.1098	51.2182	7.41667	7.66667	3.58333	4.75
sub26	7.08333	9.41667	6.41667	5.41667	5.33266	5.31946	5.18847	5.18317	7.65854	7.87765	7.65148	7.41888	51.4544	67.9484	59.1513	53.0526	3.16667	4.5	1.66667	1.58333
sub27	6.16667	6.58333	11.1667	10.1667	5.444	5.44313	5.49552	5.51475	7.58376	7.63639	8.15352	8.06075	50.8505	72.0266	98.7688	89.7844	3.5	2.75	5	5.58333
sub28	12.5833	10.8333	10.8333	10.8333	5.35652	5.41233	5.40074	5.39426	8.10259	8.00956	8.06419	8.00068	109.998	56.5578	103.367	116.992	5.25	5.75	4.41667	4.83333
sub29	12.1667	12.0833	11.4167	9.91667	5.44286	5.60927	5.43589	5.53843	8.19042	8.29777	8.12252	8.08526	223.642	92.5207	161.188	139.626	5.16667	9.58333	4.83333	5.91667
sub30	8.66667	6.91667	7.41667	7.33333	5.23085	5.18178	5.14153	5.2388	7.92308	7.80054	7.82481	7.85127	79.5545	85.7104	120.047	137.355	2.75	1.25	1.66667	2
sub31	10.1667	9.66667	6.58333	10.5	5.55045	5.4627	5.33656	5.3418	8.12435	8.03003	7.6514	8.09336	95.3691	108.765	79.4555	78.9672	7	5.83333	2.66667	4.66667
sub32	12.75	13.4167	11	10.5	5.76071	5.80328	5.6977	5.51917	8.54703	8.53151	8.32405	8.08405	78.8037	59.2033	64.797	55.5849	9.91667	10.25	7.75	5.41667
Mean	10.4792	11.2005	10.3594	10.9948	5.37775	5.41296	5.35241	5.3519	8.01738	8.09319	7.99749	8.03169	104.369	90.7525	103.618	94.9795	5.00781	5.92969	4.34635	4.82031
SD	4.16043	4.66392	5.27745	6.57739	0.1585	0.169001	0.177162	0.149366	0.407116	0.416778	0.470312	0.49051	59.586	35.1766	37.1013	31.8047	3.41777	3.76655	3.12279	3.45478
SE	0.735466	0.824473	0.93293	1.16273	0.0280191	0.0298754	0.0313182	0.0264044	0.0719687	0.0736766	0.0831402	0.0867107	10.5334	6.2184	6.55865	5.62234	0.604182	0.665838	0.552037	0.610725
Experiment c
subject	NF_GSFF	NF_GSHF	NF_PSFF	NF_PSHF	ln(MFD_GSFF)	ln(MFD_GSHF)	ln(MFD_PSFF)	ln(MFD_PSHF)	ln(MTVT_GSFF)	ln(MTVT_GSHF)	ln(MTVT_PSFF)	ln(MTVT_PSHF)	Speed_GSFF	Speed_GSHF	Speed_PSFF	Speed_PSHF	Area_GSFF	Area_GSHF	Area_PSFFNF	Area_PSHF
sub1	15.5833	12.1667	10.4167	12.5833	5.33944	5.43136	5.26947	5.27615	8.39021	8.17808	7.99359	8.16418	142.619	117.481	38.8681	58.7226	6.16667	5.58333	5.08333	5.41667
sub2	8.91667	10.75	4.58333	16.1667	5.50248	5.50791	5.25208	5.51266	8.04249	8.13111	7.23538	8.4941	661.169	184.11	141.211	266.316	3.66667	4.41667	1.41667	7
sub3	9.16667	9.08333	8	10.8333	5.70396	5.87591	5.46145	5.44205	8.23268	8.25901	7.82415	8.10762	284.208	202.679	144.258	158.637	5.08333	6.33333	3.91667	4.83333
sub4	13.75	19.6667	18.1667	15.5	5.40057	5.50894	5.34754	5.43892	8.26854	8.6968	8.50184	8.42438	281.793	340.048	249.803	682.497	7	10.75	7.91667	8.5
sub5	4.25	5.25	5.33333	3.16667	5.41383	5.58397	5.28455	5.12709	7.26327	7.63667	7.42292	7.05272	171.264	279.855	199.009	103.257	1.91667	2.08333	0.916667	1
sub6	8.83333	6.08333	6.08333	4.08333	5.48538	5.3488	5.30745	5.22168	7.92636	7.53929	7.45602	7.25853	268.968	140.774	112.431	271.827	5.08333	3.25	2.75	1.58333
sub7	12.4167	15.6667	16.9167	15.6667	5.46659	5.37321	5.54698	5.48391	8.18642	8.39811	8.58809	8.44451	427.389	486.223	247.286	371.448	7.5	7.16667	10.75	9.58333
sub8	6.75	6.58333	5	6.08333	5.15856	5.2235	5.18524	5.35962	7.60651	7.6779	7.29771	7.55289	239.539	545.933	166.436	128.171	1.91667	1.58333	1.41667	2.83333
sub9	2.91667	1.66667	2.91667	2.91667	5.17776	5.1296	5.10143	5.07016	6.91498	6.5531	7.25259	7.20328	617.761	318.222	141.852	121.275	0.75	0.75	0.166667	0.5
sub10	2.41667	5.33333	1.75	1.66667	6.09513	5.61541	5.13608	5.52625	7.15077	7.53186	6.13683	6.41059	393.596	219.637	63.0142	93.4199	2.41667	3.16667	0.833333	1
sub11	2.41667	2.25	2.08333	3.83333	5.36436	5.09806	5.05318	5.17283	6.74081	6.58179	6.50641	6.92723	220.734	301.566	72.091	120.803	1.25	0.75	0.5	1.16667
sub12	4.75	2.5	5.41667	7	5.61255	5.61883	5.37357	5.46459	7.47113	6.85988	7.2912	7.67031	616.559	277.668	80.1048	114.822	3.41667	1.66667	2.91667	4.16667
sub13	7.91667	10.3333	12.1667	10.0833	5.50418	5.39575	5.27251	5.38256	8.07059	8.15455	8.03328	7.98738	364.068	774.385	328.397	158.012	3.33333	3.33333	3.5	3.41667
sub14	10.9167	7.25	7.33333	8.91667	5.74471	5.36027	5.28758	5.38389	8.34994	7.74868	7.79359	7.9063	314.413	334.554	163.499	188.307	6.5	2.33333	1.83333	3.33333
sub15	1.5	2.16667	0.583333	0.0833333	5.92515	5.44458	4.92414	5.27811	7.00685	7.04947	5.40792	5.08451	621.392	242.613	137.357	566.496	1	0.833333	0.166667	0
sub16	4.66667	6.41667	3.75	4.83333	5.13643	5.60961	5.17803	5.23919	7.389	7.81032	7.02709	7.21266	590.954	125.509	117.453	215.009	1	3.75	1.16667	1.16667
sub17	12.0833	14.9167	14.25	15.4167	5.68393	5.60888	5.43308	5.52735	8.34639	8.47268	8.36212	8.46994	410.252	164.88	189.264	124.495	9.75	10.4167	8.08333	10.4167
sub18	11.75	9.16667	5.33333	5.75	5.31589	5.31576	5.25928	5.21855	8.13173	7.83079	7.56177	7.76889	530.393	93.1851	79.2015	249.859	5.91667	4.83333	1.5	1
sub19	18.1667	16.1667	14.6667	12.0833	5.5348	5.50191	5.40704	5.35258	8.60805	8.50137	8.35671	8.1647	433.977	173.328	220.437	122.002	11.8333	10.3333	7.75	5.25
sub20	6.91667	5.75	8.91667	7.41667	5.48139	5.40222	5.48797	5.60108	7.63992	7.40184	7.95621	7.87673	98.924	206.782	96.3327	87.2771	3.75	3	5.41667	5.58333
sub21	6.75	12.6667	9.66667	8.66667	5.27881	5.35478	5.26032	5.32451	7.65373	8.31132	7.8656	7.87471	99.5487	189.59	89.3755	140.659	3	6.75	4	4.33333
sub22	9.83333	12.4167	13.5	14.25	5.4639	5.4372	5.5297	5.37001	8.15143	8.30334	8.37996	8.3565	110.596	102.995	162.133	140.189	3.41667	5.66667	7.91667	5.83333
sub23	3.16667	5.5	8.33333	8.08333	5.32044	5.46678	5.33093	5.39634	6.99256	7.54044	7.73765	7.79945	128.211	114.264	55.3441	101.544	0.916667	2.58333	3.83333	3.66667
sub24	3.5	2.25	3.5	3.83333	5.24727	5.14814	5.36464	5.17897	6.95448	6.50553	7.03864	7.06241	123.769	263.839	218.289	412.649	1.25	0.416667	1.33333	0.75
sub25	1.58333	2.75	1.5	4.16667	5.34686	5.1422	5.16796	5.41102	6.70441	6.85365	6.35248	7.2118	127.08	107.454	46.8211	156.903	0.25	0.583333	0.25	1.83333
sub26	1.66667	2.41667	1	1.41667	5.01993	5.92555	4.99496	4.9988	6.33195	7.22457	5.78074	6.01025	307.661	125.397	255.863	203.965	0.416667	1.08333	0.25	0.0833333
sub27	9.41667	10.4167	10.25	8	5.45096	5.40376	5.32823	5.49057	7.96662	8.0092	7.9399	7.79286	308.891	168.693	84.7367	64.2592	4.66667	5.58333	3.33333	4.41667
sub28	11.0833	10.1667	7.5	7.16667	5.35836	5.65908	5.14186	5.41925	8.18839	8.3135	7.85732	7.90076	242.572	210.161	206.579	97.1772	4.33333	5	1.58333	3.33333
sub29	19.9167	26.6667	17.9167	19.6667	5.28195	5.31622	5.32781	5.38177	8.57482	8.94468	8.51119	8.66364	85.6396	115.544	147.758	110.213	7.83333	11.9167	8.25	11.75
sub30	5.16667	3.41667	6	8.75	5.2782	5.38561	5.25569	5.26791	7.31055	7.00571	7.42947	7.72988	116.168	93.5712	89.8392	72.0281	2.25	1.25	1.5	4.25
sub31	7.75	8.66667	6.75	5.83333	5.33821	5.28012	5.31308	5.33375	7.71211	7.75705	7.4955	7.43283	174.316	364.84	157.887	195.793	3.08333	3.5	2.5	2.41667
sub32	4.66667	1.83333	9.33333	9.25	5.0735	5.00942	5.25176	5.30156	7.56588	7.21285	8.02128	8.05481	308.3	260.749	93.7735	97.8942	1.08333	0.416667	3.41667	3
sub33	9.75	13.1667	6.5	5.75	5.29943	5.39383	5.13926	5.31784	8.08181	8.41144	7.84297	7.74153	353.184	378.65	563.833	237.967	3.25	5.58333	1.16667	2.41667
sub34	23.5833	24.6667	10.5	16.5833	5.71933	5.62263	5.35621	5.33672	9.06887	9.06014	8.14114	8.5051	265.188	119.932	301.574	263.563	14.0833	12.6667	3.25	5.41667
sub35	10.4167	13.4167	13.1667	10.25	5.49316	5.34001	5.33033	5.27662	8.12066	8.26507	8.27372	8.02636	122.917	135.518	209.056	103.613	4.41667	5.16667	5.25	3.66667
sub36	1.91667	1.5	2.5	1.41667	5.7798	6.13207	5.11979	5.09735	6.90592	6.88261	6.71437	6.22092	202.817	78.2801	167.747	75.8498	0.75	0.916667	0.333333	0.333333
sub37	3.5	2.41667	2.91667	4.33333	6.14352	5.46369	5.37884	5.17778	7.55591	6.92461	6.82138	6.93618	87.1553	318.511	245.196	384.098	1.5	0.916667	1	0.916667
sub38	10.0833	10.5	12.75	12.4167	5.37933	5.56871	5.63738	5.47511	8.02022	8.24416	8.40663	8.29927	182.168	427.995	138.617	241.523	3.08333	5.16667	9.08333	5.75
sub39	7.08333	5.66667	10.3333	14.9167	5.31743	5.65496	5.4216	5.51815	8.05962	8.02674	8.13859	8.62991	275.906	284.243	64.727	103.989	2.16667	3.33333	4	6.66667
sub40	0.833333	7.66667	5	7.16667	5.0689	5.37864	5.2514	5.55278	6.0864	7.77989	7.30994	7.80795	275.903	257.954	74.3047	166.071	0.0833333	2.5	1.58333	4.91667
Mean	7.94375	8.68333	7.81458	8.4	5.44266	5.45095	5.28676	5.34265	7.69357	7.76475	7.5516	7.65596	289.699	241.19	159.044	189.315	3.77708	4.18333	3.29583	3.8375
SD	5.29259	6.13192	4.78146	4.94371	0.255422	0.222174	0.148102	0.142793	0.664081	0.671586	0.762931	0.769865	167.319	142.24	97.7625	134.147	3.16494	3.32146	2.8624	2.88076
SE	0.836832	0.969542	0.756015	0.781669	0.0403857	0.0351288	0.023417	0.0225775	0.105	0.106187	0.12063	0.121726	26.4555	22.4901	15.4576	21.2105	0.500422	0.52517	0.452586	0.455488
Experiment 1
subject	NF_GSFF	NF_GSHF	NF_GSNF	NF_PSFF	NF_PSHF	NF_PSNF	NF_NSFF	NF_NSHF	NF_NSNF	LN(MFD_GSFF)	Ln(MFD_GSHF)	LN(MFD_GSNF)	LN(MFD_PSFF)	LN(MFD_PSHF)	Ln(MFD_PSNF)	LN(MFD_NSFF)	Ln(MFD_NSHF)	LN(MFD_NSNF)	LN(MTVT_GSFF)	Ln(MTVT_GSHF)	LN(MTVT_GSNF)	LN(MTVT_PSFF)	LN(MTVT_PSHF)	Ln(MTVT_PSNF)	LN(MTVT_NSFF)	Ln(MTVT_NSHF)	LN(MTVT_NSNF)	Speed_GSFF	Speed_GSHF	Speed_GSNF	Speed_PSFF	Speed_PSHF	Speed_PSNF	Speed_NSFF	Speed_NSHF	Speed_NSNF	Area_GSFF	Area_GSHF	Area_GSNF	Area_PSFF	Area_PSHF	Area_PSNF	Area_NSFF	Area_NSHF	Area_NSNF
sub1	4.5	5.625	4	2.75	4.625	4.375	2.625	3	4.125	5.73863	5.87237	5.68772	5.51691	5.61105	5.48563	5.25402	5.2762	5.49081	7.30678	7.64635	7.14273	6.78219	7.24172	7.25727	6.75519	6.64118	7.14332	9.04427	2.99905	8.12104	6.85671	6.68869	0.568518	1.27783	2.02278	4.53781	3.125	2.875	1.875	0.75	2.75	1.375	0.25	1.375	2.125
sub2	6.5	6.75	5.375	9.125	9.75	9.875	6.75	7.25	7	5.59921	5.46947	5.56211	5.43921	5.3938	5.42003	5.50819	5.41908	5.64444	7.60682	7.51589	7.4229	7.78614	7.79965	7.85467	7.5734	7.55865	7.78015	1.37802	1.14404	0.938829	1.39935	3.45199	1.88565	1.52336	9.73304	1.35536	3	2.25	2.625	4.75	5.125	5.25	2.75	2.875	2.375
sub3	4.25	10.5	6.125	5	4.5	6.5	6.25	7.375	7.125	6.62184	5.7363	5.74169	5.98953	5.86788	5.59514	5.67881	5.72453	5.86114	8.09121	8.15407	7.64677	7.64114	7.45168	7.55401	7.59852	7.79714	7.89427	2.65858	4.55544	9.22439	2.08038	2.28196	3.80271	0.703799	0.642321	1.99894	3.5	7.5	4.5	5.125	4.125	5.25	5.25	5.625	6.25
sub4	11.125	10.5	14.875	12.375	14.625	10.875	12.375	15	13.875	5.43979	5.27878	5.32645	5.3573	5.31778	5.38502	5.3994	5.27458	5.35062	7.91338	7.76779	8.10414	8.00845	8.17414	7.95556	8.00524	8.12965	8.18765	6.69034	5.20923	5.40897	2.12663	1.73774	5.14022	5.78536	3.56859	4.59003	7.625	4.125	6.75	4.25	4.125	4.375	4.125	5	6.125
sub5	5.375	6.75	6	7.125	4.75	4.5	3.875	5	5.875	5.31983	5.57483	5.4762	5.50519	5.37796	5.36714	5.46178	5.38839	5.41193	7.20777	7.56728	7.37463	7.56806	7.10157	7.03867	6.8864	7.15188	7.33816	7.44591	6.31876	8.16026	3.18503	2.75057	4.64336	17.4543	0.580588	1.52944	2	4.75	3.875	3.625	2.5	1.25	1.75	3.125	3.25
sub6	4.5	5.25	4.25	13.75	10.875	13.375	6.75	9.75	10.5	5.49808	5.3065	5.4461	5.39894	5.75865	5.61367	5.39917	5.44773	5.43533	7.29794	7.31155	7.12267	8.35567	8.26398	8.37598	7.57738	7.9376	8.06389	8.81643	1.85078	4.28248	2.24279	2.63138	1.59077	1.31095	1.49399	1.42321	1.75	1.375	2.125	7.625	6.25	7.5	2.5	4.375	4.25
sub7	3.25	4.125	1.875	6	1	2.5	4.5	3	4	5.11268	4.87682	4.89285	5.00339	4.91081	4.89709	5.02571	4.81151	5.2588	7.60986	7.89702	6.84495	8.12836	7.3891	7.37392	7.73385	7.46372	7.59104	12.9017	7.9274	1.57449	3.60093	0.525508	0.702952	2.12433	1.71746	0.842838	2.25	1.75	0.625	0.875	0.125	0.25	0.5	0.625	2.875
sub8	12.375	8.875	16.625	17.375	14.625	15.75	11.25	15.875	15.875	5.4361	5.60813	5.47813	5.55045	5.6423	5.5529	5.60417	5.65014	5.56567	8.07896	7.91009	8.4483	8.48107	8.40713	8.39706	8.1274	8.51251	8.41994	2.97568	3.88936	2.77763	5.08371	4.63025	2.73973	8.62489	4.05072	2.79538	4	4.375	5.625	8.5	6.625	8.75	6.625	8.25	7.625
sub9	7.5	7.625	10	7.75	10	10.25	11.75	9.125	8.875	5.93943	5.63911	5.72839	5.64431	5.69998	5.8405	5.69813	5.66813	5.67786	8.01413	7.75303	8.09082	7.79364	8.0994	8.24417	8.22416	7.95976	7.90604	3.17348	3.11147	6.0768	2.50223	0.872007	1.37163	7.33385	2.87365	9.69545	6	4.25	6.125	5.375	6.75	9.125	7.875	7.25	5.375
sub10	4.5	4.625	4.625	7.25	6.25	11.375	5.75	6.625	6.875	5.92344	5.7679	6.09728	5.66911	5.69387	5.80301	5.65971	5.73803	5.68079	7.44161	7.31155	7.64671	7.72974	7.56896	8.27989	7.44352	7.69297	7.65728	4.37475	13.2435	3.76335	7.58081	4.5705	2.19109	5.09624	10.4848	10.155	2.875	2.625	3.875	5	4	7.875	5.125	5.125	5.625
sub11	3.625	4	2.375	3.25	2.25	2.875	2.625	2.375	4.5	5.72898	5.64853	5.75408	5.71652	5.42764	5.59212	5.69709	5.59236	5.57479	7.09268	7.09693	6.64444	6.93998	6.2519	6.86849	6.70869	6.50223	7.22101	1.93192	3.73588	8.47021	8.20161	7.8103	1.25769	8.14894	8.4917	2.3198	1.875	2.75	1.75	1.875	1	1.125	1.875	1.25	2.25
sub12	5	5.5	6.75	6.25	6.625	8.125	5.625	5.875	5.75	5.45425	5.63056	5.57032	5.7471	6.14867	5.48384	5.6241	5.61685	5.44982	7.2436	7.39211	7.61258	7.67694	8.07294	7.66862	7.4433	7.48843	7.38732	5.86556	12.549	9.80013	6.04742	3.64387	2.16233	0.218514	1.91201	0.983733	3.5	3.625	4.125	4.5	5.875	4.5	4.125	3.5	3.875
sub13	5.125	4.125	6.25	7.75	8.375	6	4.625	8.25	6.125	5.68383	5.83958	5.64912	5.92607	5.72918	5.75224	5.71445	5.6463	5.69428	7.41593	7.29438	7.59451	8.03678	7.93545	7.62395	7.31597	7.85331	7.58566	2.99326	5.18647	3.43211	1.8883	3.30007	7.85216	3.25748	3.81777	2.30147	2.375	2	3	4.625	4.125	2.5	3.125	3.625	2.625
sub14	7.5	9	9.875	7.375	8.75	10	8.5	7.375	11.125	5.65855	5.5873	5.7124	5.68853	5.69267	5.59043	5.53757	5.53707	5.57147	7.73341	7.88444	8.07169	7.75587	7.92994	7.96185	7.78847	7.61856	8.07036	2.2846	2.32516	2.79763	3.89494	3.18813	5.17514	5.55396	2.12199	4.299	2.5	3.5	3.875	4.25	5.875	4.75	4	3.75	5.625
sub15	11.875	8.125	7.75	7.75	5.125	8.625	7.25	7.875	9.875	5.46659	5.59705	5.62698	5.55539	6.20011	5.76923	5.72707	5.68315	5.63619	8.09564	7.78302	7.78826	7.81667	7.86873	7.98084	7.78416	7.82505	8.00603	1.33375	1.55213	0.954811	0.199904	0.339824	0.56596	0.515317	0.6514	0.365262	5.125	4.25	3	3.875	4.75	6.125	5.375	4.875	6.75
sub16	2.5	2.75	2.375	3.625	4.125	0	1.25	3.125	4	5.70095	5.75459	5.58389	5.55723	6.47767	5.51884	5.56107	5.62762	5.50228	6.7386	6.84202	6.61941	6.99645	7.97685	7.76506	6.18801	6.9471	7.04969	1.41759	4.19393	10.7937	2.48132	5.94751	4.69817	15.5119	11.6518	19.4062	1.125	1.25	1	2.625	3	0	0.375	1.75	2.625
sub17	2.875	4.375	6.25	4.25	4.125	3.5	3.875	3.75	4.875	5.68358	5.63295	5.6991	5.87559	5.68656	5.81488	5.92907	5.81144	5.50741	6.77294	7.18055	7.61647	7.36999	7.28259	7.17002	7.31663	7.18378	7.17319	6.63705	7.98875	4.43111	8.02307	0.833134	0.56016	2.53696	34.1556	2.36559	2	2.625	3.625	4.125	2.75	2.25	3.375	3	3.25
sub18	7.25	7.5	8.75	8.625	7.75	6.25	5.875	8.625	4.125	5.22852	5.26502	5.31819	5.36455	5.36552	5.32184	5.31079	5.35193	5.21444	7.89026	7.94116	7.95428	7.85845	7.81035	7.65468	7.662	7.9588	7.45356	4.68881	5.04726	5.27306	1.7461	2.04958	3.16703	2.40344	1.99129	3.09999	1.875	1.75	2.375	3.125	2.375	2.125	1.125	2.25	1
sub19	15.875	18.375	13.125	11.25	12.875	8.75	13.5	12.875	12	5.07763	5.18037	5.0969	5.32458	5.30224	5.27307	5.33754	5.43313	5.36705	8.58802	8.56381	8.26249	8.02322	8.1835	7.82044	8.21808	8.35356	8.28866	1.50801	1.85793	1.12835	2.14248	3.15647	2.63821	3.29456	1.39041	1.07352	0.375	1.125	0.5	1.5	1.75	0.75	2.625	3.125	1.25
sub20	9.75	7	12.875	7.375	8.625	9.875	10	10	14.625	5.78284	5.81216	5.78062	5.76317	5.77904	5.78604	5.59782	5.74752	5.67965	8.11286	7.81768	8.40237	7.8334	8.0019	8.15274	8.01235	8.1233	8.4502	3.82093	10.292	7.05847	5.72689	3.16577	5.93276	5.7362	4.87686	6.15999	9.25	6.25	11.125	5.875	7.25	7.875	7.25	7.625	12.5
sub21	9	11.625	10.5	9	9.125	6.375	8.375	11.5	10	5.40692	5.54757	5.48519	5.48698	5.38976	5.51461	5.48157	5.37864	5.44177	7.77737	8.08163	7.93572	7.77811	7.735	7.44833	7.71233	7.96893	7.90986	7.60837	3.74341	2.5097	0.824322	9.84649	4.98372	2.23133	0.738006	11.3412	1.25	3.25	4.375	4.375	3.625	2.625	3.5	3.125	2.875
sub22	9.875	7.5	9.25	6	5.875	6.625	7.625	11.625	8.75	5.56165	5.5018	5.48272	5.37451	5.41865	5.46439	5.44419	5.38676	5.41349	7.93764	7.63476	7.78676	7.27569	7.33139	7.43418	7.59815	7.96176	7.69984	5.5612	9.71757	4.12748	1.84502	19.7658	1.67041	1.85379	1.61007	3.02808	5.25	4.5	5.375	3.625	3.5	3.75	3.125	5.625	5.125
sub23	4	2.625	4.875	4.375	3.125	3.25	2.625	3.375	4.375	5.48945	5.38972	5.76992	5.59322	5.56896	5.49464	5.35883	5.46085	5.32704	7.00056	6.68242	7.4151	7.14736	6.86093	6.84867	6.82722	6.83128	7.10957	1.62507	17.7373	1.98158	7.31093	5.25361	7.83204	9.48939	7.00759	13.0928	0.375	0	2.125	1.375	0.375	1	0.125	0.75	0.25
sub24	11.5	11.5	12.375	9.5	13.125	6.75	7.875	0	10.625	5.75212	5.79159	5.65874	5.76184	5.34992	5.79092	5.59329	5.49026	5.76814	8.26327	8.30533	8.29098	8.08633	8.33068	7.77758	7.80842	2.70805	8.20645	6.078	6.21007	3.34982	7.1023	7.62262	4.2962	8.10816	5.48116	6.7884	4.75	4.25	5	3.875	3.125	3.875	3.125	0	5.125
sub25	6.625	9.625	10.875	9	9.375	8.25	9.5	11	11.5	5.41911	5.26101	5.30872	5.59218	5.35356	5.55677	5.43205	5.31416	5.34389	7.79163	7.98015	8.08483	7.92823	7.99138	7.86336	7.92913	8.07768	8.17011	7.8221	5.04373	5.95948	5.11222	7.09819	4.90922	7.62325	8.76752	11.7585	0.625	0.5	0.5	2	1.125	1	1.25	0.625	0.875
sub26	9	8.375	9.625	8.625	6.125	10.625	8.25	8.625	8.375	5.56558	5.64981	5.5726	5.88336	5.90969	5.61814	5.68425	5.7383	5.59781	7.90373	7.89915	7.98977	8.09308	7.76212	8.0575	7.88552	7.94321	7.79487	0.852446	1.03113	1.4367	1.3475	6.3341	3.81237	1.38659	1.59244	1.21514	1.75	1.875	1.5	5.625	3.5	3.875	2.625	5	3.875
sub27	0	5.75	5.125	2.75	2.5	3	3.375	1.125	4	5.5442	5.45188	5.42624	5.3845	5.38427	5.40023	5.53031	5.30772	5.47293	1.85238	7.39203	7.24217	6.46653	6.3714	6.69734	6.84108	5.633	6.94589	8.17154	1.08486	1.99222	11.7002	7.39589	13.6319	49.2551	0.6547	1.60332	0	4.125	3.125	1.25	1.625	1.125	2.5	0.25	2
sub28	2.5	2.75	1.375	3.875	10	6.75	2.25	1.375	1.5	5.56873	5.15092	5.59606	5.32975	5.64239	5.5851	5.12858	5.2608	5.18506	7.01661	7.03747	6.91919	7.04578	8.06413	7.67049	6.67013	6.26506	6.19873	45.9819	8.2459	50.441	2.94102	9.48826	7.19195	30.178	5.2876	24.0664	0.875	0.875	0.5	1.375	6.25	3.375	0.75	0.375	0.25
sub29	8.375	6.5	6.5	11.75	9.125	14.625	15.375	9.875	9	5.4825	5.28953	5.44616	5.26566	5.20859	5.32063	5.32067	5.2868	5.28834	7.79529	7.60819	7.57295	8.09678	7.90461	8.25466	8.3671	7.91986	7.89692	7.71816	11.9421	15.5281	9.60697	11.0361	8.40829	9.20917	3.39025	6.59965	3.25	1	0.625	1.125	0.75	1.5	2.125	1	0.375
sub30	12.875	19.625	17.375	18.5	7.375	10.5	16.25	14.875	19.25	5.3786	5.33879	5.3539	5.35652	5.38783	5.41303	5.35684	5.47358	5.38771	8.10285	8.47796	8.41122	8.45031	7.6132	7.95468	8.30656	8.31899	8.51143	8.20147	3.56675	1.54953	4.00401	0.862571	1.79524	1.82751	1.297	1.04225	4	6.875	5.75	8.25	4.75	4.75	5.875	6.5	7.625
sub31	10.125	7.625	13.625	6.25	10	6.75	11.125	13.125	12.75	5.53719	5.33691	5.37791	5.4052	5.41632	5.47994	5.56068	5.47051	5.51299	8.02109	8.04515	8.37899	7.80497	7.98591	7.87521	8.13944	8.27385	8.32918	7.70444	13.8732	9.39993	5.04573	7.72969	11.7476	4.96716	6.69063	10.2764	3	1.875	2.625	0.75	1	0.875	1.625	1.625	1.375
sub32	5.875	12	9.625	15	11.125	8.25	10.5	13	7.625	5.36329	5.37788	5.31723	5.63324	5.55026	5.54996	5.38739	5.43607	5.3182	7.55871	8.29542	8.16994	8.45172	8.20231	7.87126	7.97328	8.25648	7.73056	2.43434	3.36672	5.24462	4.37429	7.71669	4.53037	2.84916	4.77092	3.77404	0.5	0.25	0.25	3.625	2.25	1.625	1.625	0.625	0.125
sub33	12	11.375	10	10.375	12.875	9.5	8.5	9.25	14.875	5.74677	5.70576	5.74704	5.76038	5.89103	5.70685	5.73591	5.73242	5.92165	8.3144	8.19616	8.14544	8.1569	8.50373	8.02601	7.95849	8.03118	8.67588	3.88837	5.51246	4.9914	1.56117	5.46451	11.023	2.40999	1.19644	2.91214	6.5	6.125	6	5.375	7.75	5.625	5	5.5	9.125
sub34	18.5	10.625	19.125	8.25	11.375	13.5	9.625	13.25	16.375	5.58032	5.51267	5.5758	5.64169	5.65688	5.52752	5.55738	5.6872	5.6619	8.62797	8.04306	8.67386	7.87198	8.19812	8.27397	7.96918	8.35887	8.55865	5.37532	15.2016	5.66672	4.80914	4.20476	4.84072	12.3286	14.05	4.1034	11.25	7.625	12.75	6.75	8.625	9	6.875	10.875	12.875
sub35	11	1.5	2.875	12	11.125	7.125	7	3.125	3.875	5.16893	5.09273	5.06149	5.17962	5.29268	4.9978	5.13968	5.34138	5.00069	8.25209	7.53923	7.72483	8.23493	8.22981	8.01566	7.98071	7.64588	7.81384	8.87883	9.37664	13.1245	1.80553	5.41095	4.08799	4.48392	8.21509	17.6792	2.125	0.25	0.375	3.875	4.25	1.375	1.75	0.875	0.125
sub36	4.75	4	3.75	4.125	6.375	6.125	3.125	3.25	5.75	5.65829	5.48945	5.76006	5.9455	5.92179	5.86032	5.79958	5.90641	5.7954	7.30971	6.95857	7.21183	7.38608	7.79106	7.70852	6.97646	7.1026	7.5814	4.46152	9.6515	5.41685	1.29554	4.52967	6.02106	5.41282	21.0482	3.08874	2	1.125	1.5	3.75	5.875	5.75	2.125	2.625	4.375
sub37	5	8.375	5.25	13.75	12.25	15.5	8.375	10	12.625	5.75027	5.62655	5.59657	5.57226	5.69229	5.81215	5.63233	5.53694	5.69337	7.58248	7.92719	7.46608	8.35617	8.33917	8.67165	7.92421	8.0394	8.40018	10.2535	5.65216	6.86225	6.60405	9.87484	5.48623	9.44829	8.61825	4.72244	1.75	1.875	1.75	9	8.875	11.625	4.5	4	6.125
sub38	5.125	6	7.125	5.375	7	6.625	8.125	6.375	7.125	5.49996	5.65461	5.61722	5.53376	5.38915	5.28282	5.36367	5.53114	5.49645	7.24566	7.56385	7.70678	7.33881	7.58	7.32053	7.56411	7.51023	7.57282	6.1658	7.71802	4.84894	4.48722	1.68353	1.33527	4.36555	1.92491	6.30024	3.375	4.25	6.125	4.375	4.5	3.125	5.5	4.625	5.5
sub39	4.5	5.5	6.5	9.625	8.625	11.5	12.375	9.75	12.125	5.55511	5.54509	5.48949	5.37052	5.51249	5.53554	5.45989	5.47243	5.42113	7.09858	7.34286	7.45682	7.7139	7.74549	8.06093	8.06428	7.8252	7.99049	19.3795	5.52484	6.58553	8.00142	6.59916	5.72076	5.44194	5.94991	5.52515	2.25	3.5	4.25	5.625	5.75	8.625	7.75	5.5	7.5
sub40	0.125	0.125	7.125	5.125	1.875	5.875	5.5	2.5	4.125	4.64439	5.28827	5.10998	4.94529	4.98862	4.97966	4.97438	4.9523	4.88418	7.02487	7.10013	7.93978	7.83948	7.5026	7.77391	8.01661	7.50474	7.57379	66.7589	10.3928	6.26455	3.9396	5.31053	15.9562	9.89019	2.72699	14.3509	0	0.125	0.625	0.25	0.125	0	0.25	0.375	0
Mean	7.15	7.35938	8.075	8.23125	7.95	8.02187	7.51875	7.72813	8.64375	5.5442	5.50202	5.52454	5.54023	5.57521	5.51884	5.49168	5.49026	5.48767	7.51823	7.66854	7.72335	7.75263	7.77136	7.76506	7.62188	7.52188	7.78345	8.17154	6.48926	6.54372	4.26822	5.17008	4.69817	7.0293	5.48116	5.86416	3.025	2.98125	3.4375	3.9625	3.96875	3.9375	3.3	3.45625	4.07812
SD	4.10374	3.98718	4.38993	3.86362	3.59083	3.67509	3.68507	4.26561	4.23504	0.297813	0.22631	0.231418	0.23815	0.308409	0.228834	0.208532	0.219467	0.215312	1.03731	0.449764	0.507667	0.476223	0.505586	0.447949	0.525605	0.996993	0.519163	12.0075	4.21111	7.86664	2.72026	3.68328	3.5927	8.85235	6.3622	5.61661	2.44232	2.04213	2.75029	2.22425	2.34721	3.02328	2.19334	2.54582	3.16464
SE	0.648859	0.630428	0.694109	0.610891	0.56776	0.581083	0.582661	0.674452	0.669618	0.0470883	0.0357828	0.0365905	0.0376548	0.0487637	0.0361819	0.0329718	0.0347008	0.0340439	0.164013	0.0711139	0.0802692	0.0752974	0.0799402	0.070827	0.0831054	0.157638	0.0820869	1.89855	0.665835	1.24383	0.430111	0.582378	0.568056	1.39968	1.00595	0.888064	0.386164	0.32289	0.434859	0.351684	0.371127	0.478023	0.346797	0.40253	0.500374

## Sheet: Mood induction
Experiment a
subject	Valence_Grisly	Valence_Pleasant	Arousal_Grisly	Arousal_Pleasant
sub1	3.66667	3.66667	2	2
sub2	2.66667	5.33333	5	2
sub3	3.33333	5	2.66667	3.33333
sub4	4	5	4	5.33333
sub5	3.66667	5.66667	4	3.33333
sub6	3.66667	4.33333	2.66667	1.66667
sub7	4.66667	3.33333	5	4
sub8	2.33333	5.66667	5.33333	5
sub9	3.33333	5.66667	3.33333	2.33333
sub10	4.66667	6	5.33333	4.33333
sub11	2.33333	4	2.66667	1
sub12	3.33333	3.33333	3.66667	2.66667
sub13	2.33333	3.33333	3.33333	3.66667
sub14	5.33333	6.33333	4.33333	5.33333
sub15	3	6.33333	3.66667	1
sub16	3.33333	5.66667	5	4.66667
sub17	4.66667	5.33333	5	5
sub18	3	3.66667	1	1
sub19	2	4.66667	5	2.66667
sub20	5	3.33333	1	2.33333
sub21	4.33333	6.33333	2.33333	2
sub22	2	4	4.66667	3.33333
sub23	2.66667	6.66667	5.33333	5
sub24	3.33333	4.66667	3	2.33333
sub25	3.33333	2.33333	3.33333	5
sub26	2.33333	4.66667	5.33333	5
sub27	4.33333	4.33333	4.66667	3
sub28	1.66667	4.33333	3	3.66667
sub29	4	5.33333	1.66667	2
sub30	5.33333	5.33333	1.33333	2.33333
sub31	1.66667	5.33333	1.66667	4.33333
sub32	3.66667	4	3.33333	2
Mean	3.40625	4.78125	3.55208	3.20833
SD	1.03949	1.08297	1.37726	1.37762
SE	0.183757	0.191444	0.243467	0.243532
Experiment b
subject	Valence_Grisly	Valence_Pleasant	Valence_Neutral	Arousal_Grisly	Arousal_Pleasant	Arousal_Neutral
sub1	3	3	3.66667	3.66667	2	3.33333
sub2	1.66667	5.33333	3.66667	5.66667	3.66667	2.33333
sub3	4	5	4.66667	3.66667	4	3
sub4	4	5	4.33333	3	3.33333	3.33333
sub5	2.33333	5.66667	4	2	2.33333	1.66667
sub6	1.66667	4	3	4.66667	4	3
sub7	1	6.66667	2.66667	6.66667	3	3.33333
sub8	2.33333	3.33333	3.33333	4	4.66667	4
sub9	3	4.33333	3.66667	3.66667	3	3
sub10	1	4.33333	3	6.66667	3.66667	4
sub11	2	4.33333	3	2.66667	3.66667	2.66667
sub12	2	4.33333	4.33333	5	4.66667	4.66667
sub13	2	3.33333	3.66667	6.33333	5	3
sub14	2.66667	4.66667	3.66667	5.66667	4.33333	1.33333
sub15	5.66667	6	5.33333	5.66667	4	6
sub16	1	5	3.33333	6.33333	3.33333	2.33333
sub17	3	4	4	5	4	4
sub18	1.66667	6	3.66667	5.33333	4.66667	3
sub19	3.33333	5	5.33333	6.33333	6	5
sub20	5	5	5	5	5	5
sub21	2	5	4.33333	5.33333	4	3.33333
sub22	1	2.33333	2.66667	5.33333	3	2.66667
sub23	3	4.66667	3.33333	2.66667	3.66667	2
sub24	1.66667	1	3.33333	5.66667	6.33333	4.33333
sub25	2.66667	4.66667	3.66667	3.33333	5	4
sub26	5	5	4.66667	5	3.33333	3.66667
sub27	1	3.66667	6	6.33333	5	5
sub28	3.33333	4.66667	3.66667	3.33333	4	2.66667
sub29	5	5	4.66667	2.33333	3	2.33333
sub30	3	4.33333	2.66667	4.66667	4.33333	5
sub31	4	3.66667	3	3.33333	3.66667	3
sub32	5	5.33333	4	5.66667	5.66667	5
Mean	2.78125	4.48958	3.85417	4.6875	4.04167	3.46875
SD	1.35628	1.10711	0.833602	1.36767	0.990094	1.11638
SE	0.239759	0.195711	0.147361	0.241772	0.175026	0.19735
Experiment c
subject	Valence_Grisly	Valence_Pleasant	Valence_Neutral	Arousal_Grisly	Arousal_Pleasant	Arousal_Neutral
sub1	2.66667	4.33333	4.33333	3	2.66667	1.66667
sub2	5	5.66667	5.33333	4.66667	5	5
sub3	3	5.33333	4	4	4.33333	4.33333
sub4	2.66667	4.33333	4	5.66667	5	4
sub5	1.33333	6	4	5.66667	2.33333	3.33333
sub6	3.33333	5	4	5.66667	5.33333	3.66667
sub7	3.66667	7	7	4.66667	2	2
sub8	1	5.33333	3.66667	7	5	5.66667
sub9	1.66667	4.33333	3.33333	5.66667	4.33333	3
sub10	5	7	6	1	1	1
sub11	2.33333	5.66667	5	5.33333	5	3.33333
sub12	2.33333	5	4	6	5	4.33333
sub13	3	5.66667	4	6	5.33333	5
sub14	2.66667	4.66667	4.33333	4.33333	1.66667	1
sub15	2.33333	4.66667	3	5	4.33333	3
sub16	3.66667	4.33333	3.33333	4	3	2.33333
sub17	3	4	4.33333	4.66667	3.33333	3
sub18	3.33333	4.33333	3.33333	4.33333	4	4
sub19	3.66667	6	5.33333	2	4	3.66667
sub20	2.66667	5	4	4	3.33333	2.66667
sub21	2.66667	4.66667	4	5	4	4.33333
sub22	5	5.33333	4	5.66667	5.66667	5
sub23	4.33333	3	3	4.33333	3.66667	5
sub24	2	6	4.33333	3	5	4
sub25	6	6	6	6	6	6.33333
sub26	3	4.66667	4.66667	5	4	4
sub27	3	4.33333	5.33333	3.66667	2	3
sub28	5	4.33333	5	1	1.66667	1
sub29	4	5.66667	5.66667	4	4	4
sub30	4.33333	4.66667	4.33333	2	2	2.33333
sub31	4.33333	5	5	2	1	1
sub32	4.33333	4.33333	5.33333	4.66667	3	4
sub33	4	4.66667	4	3.66667	4.33333	3.66667
sub34	2.66667	4.66667	4.33333	3.66667	1	2.33333
sub35	4	5	5.33333	4.33333	4	3.33333
sub36	1.66667	5.33333	2.33333	4.33333	5	4
sub37	3.33333	5.33333	3.66667	2	2.66667	2
sub38	3	4.33333	4	4	4	4
sub39	4.33333	4.66667	5	4.33333	4	3.66667
sub40	1	6.33333	4.66667	6.33333	5.33333	4
Mean	3.25833	5.05	4.40833	4.29167	3.70833	3.425
SD	1.16816	0.814925	0.932134	1.43657	1.39021	1.28765
SE	0.184703	0.128851	0.147383	0.227142	0.219812	0.203596
Experiment 1
subject	Valence_Grisly	Valence_Pleasant	Valence_Neutral	Arousal_Grisly	Arousal_Pleasant	Arousal_Neutral
sub1	3.66667	6	5.33333	5	2	2.33333
sub2	2.33333	6	4	5.66667	4.66667	1.66667
sub3	6	5.66667	4.33333	2.66667	2.66667	4
sub4	3.33333	5.66667	3.33333	4.66667	5.33333	3
sub5	6.66667	3.66667	4.66667	5	4	4.66667
sub6	2	5	5	2.33333	3.33333	5
sub7	3	4.33333	4	3	1.66667	1.66667
sub8	3	4.33333	4	2.66667	2.33333	3
sub9	2	5.33333	3.33333	6	5	2.33333
sub10	1.33333	6	5	5	2.66667	2.33333
sub11	4.66667	4.66667	4.66667	3.33333	4	3.33333
sub12	4	4	4	3.66667	4	4
sub13	1	5.33333	3	6.66667	4.33333	1.66667
sub14	1	3.33333	2	5	1.33333	1.66667
sub15	4	5.66667	3.33333	5	3	2.33333
sub16	2	3.33333	3.66667	4	4	4
sub17	3	5.33333	4.66667	5.33333	2.66667	4
sub18	1	6	3.33333	6.33333	5.33333	3.33333
sub19	4.33333	5.33333	4.33333	5.33333	3.66667	4.33333
sub20	2.33333	4.33333	3.66667	4.33333	4.66667	3.33333
sub21	3	7	4	5	4	4
sub22	3.33333	5.33333	4	4.33333	5	3.33333
sub23	1	4	2	4.66667	5	2.66667
sub24	3	5.33333	4	3.66667	2.33333	4.33333
sub25	3	4.66667	4	4	4.33333	2
sub26	2.33333	6	3.33333	5	5	2.33333
sub27	4.66667	3.33333	2.66667	4	2.66667	3.33333
sub28	1	6.33333	4	6	3	1.33333
sub29	3.66667	5.66667	5.66667	3.66667	4.66667	4
sub30	1	3.66667	3.66667	4.66667	4.33333	3.66667
sub31	2.66667	4.66667	3.66667	4.33333	3.33333	2.33333
sub32	2	5.33333	3	5.66667	4	1
sub33	2	6	4	5.66667	2	1
sub34	4	4	4	3.66667	3.33333	2.33333
sub35	3.33333	4.33333	3	4	4.33333	4.33333
sub36	1.66667	3.66667	3.33333	2	3	3
sub37	3	4	4.33333	5	4	4
sub38	4.33333	4	4	3.33333	3.33333	3.33333
sub39	3.33333	6	6	4	6	6
sub40	3	6	5	4.66667	5.33333	4
Mean	2.9	4.96667	3.93333	4.45833	3.74167	3.10833
SD	1.3444	0.974899	0.861325	1.09567	1.13852	1.15319
SE	0.212568	0.154145	0.136187	0.173241	0.180016	0.182335
Experiment 2
subject	Valence_Grisly	Valence_Pleasant	Arousal_Grisly	Arousal_Pleasant
sub1	4	3.5	3.5	3
sub2	2.5	5	3.5	3.5
sub3	6	6	6	6
sub4	4.5	5.5	3	2
sub5	4.5	5	3	4.5
sub6	4.5	6	3.5	2.5
sub7	3.5	6	4	5.5
sub8	4	2	3.5	2
sub9	6	6.5	5	5.5
sub10	4	5	4.5	5
sub11	6	7	4.5	5.5
sub12	6	6	6	4.5
sub13	4.5	4	4	4.5
sub14	1.5	5	1.5	3.5
sub15	3	3.5	5	1.5
sub16	3.5	4	1	2.5
sub17	4.5	5	3.5	4
sub18	6	5	5.5	3
sub19	3.5	3.5	2.5	2
sub20	5.5	6	1.5	4
sub21	4	5	4.5	2
sub22	4	4	2	2
sub23	2.5	5.5	5	2.5
sub24	3.5	6	3	4
sub25	3.5	2.5	4	4
sub26	2	2.5	4	5
sub27	1.5	3.5	3.5	2.5
sub28	4	5	2	2
sub29	4	6	5	5.5
sub30	3	4	4.5	3.5
sub31	2.5	5.5	3.5	3
sub32	3	5	5.5	4.5
sub33	5.5	5	4.5	4.5
sub34	2.5	6	4	6
sub35	3	3	4	4
sub36	2	4.5	4.5	4.5
sub37	3.5	5.5	5	4
sub38	5	5.5	4.5	4
sub39	3.5	5	2.5	3
sub40	3	5	1	3
sub41	1	5.5	6.5	4
sub42	5.5	6	5.5	6
sub43	2.5	5	5.5	4
sub44	2.5	6	4.5	6
sub45	5	4	4.5	4.5
sub46	6	5.5	2	2
sub47	3	4.5	4.5	4
sub48	5	5	5.5	4
sub49	5.5	6	4	3.5
sub50	4.5	6	4.5	6
sub51	4	1.5	4.5	1.5
sub52	5	6	5	6
sub53	4	4	3	3
sub54	5	6	4.5	5.5
sub55	5	5	3.5	5
sub56	3.5	5	5	5
sub57	4.5	5	5	5
sub58	3.5	4	4.5	4
sub59	3.5	4	3	3
sub60	2.5	5	6	6
sub61	2	6	6	5
sub62	3.5	6	5.5	6
sub63	4.5	5	6	4.5
sub64	2.5	6	6.5	2.5
sub65	2	4.5	3	2.5
sub66	1	1	4	7
sub67	6	6.5	6	6.5
sub68	1.5	6	6	6
sub69	4.5	5.5	4	4.5
sub70	4	4.5	3	4
sub71	1.5	7	6	6
sub72	6	6.5	5.5	5.5
sub73	3	4	3	4
sub74	2.5	4	5.5	3.5
sub75	5.5	6.5	4.5	6
sub76	3	6	5	5.5
sub77	2	5.5	5.5	5
sub78	3.5	3.5	2.5	2.5
sub79	3	5	2.5	5
sub80	2	3.5	4.5	5.5
sub81	3	3	4	6.5
sub82	2	6	6	6
sub83	6	6.5	4.5	4.5
sub84	3.5	5.5	6.5	6
sub85	4.5	5.5	5.5	5.5
sub86	3.5	3	3	3
sub87	4	5	5	3.5
sub88	3	4.5	2.5	1.5
sub89	3.5	4	4	2.5
sub90	2	4	3.5	3.5
sub91	4	5.5	2	3.5
sub92	5	6	5	6
sub93	4	6	5	5.5
sub94	3.5	6	2.5	6
sub95	6	7	6	7
sub96	6	6	3	6
sub97	1	2	1	1
sub98	4	4.5	3.5	3
sub99	2	3.5	6	5.5
sub100	3	4	5	4.5
sub101	2	6	6	4
sub102	4.5	4.5	4	4.5
Mean	3.70098	4.93137	4.21569	4.23529
SD	1.35021	1.22684	1.347	1.43972
SE	0.133691	0.121476	0.133373	0.142554

## Sheet: MatetrialPic
Materials Experiment b and c
	index	Valence	Arousal	index	Valence	Arousal	index	Valence	Arousal
Female	FF1	2.73	7	HF1	7.14	5.33	NF1	3.25	3.67
	FF2	3.86	4.33	HF2	5.93	3.67	NF2	4.45	4.67
	FF3	2.52	7.33	HF3	6.07	4.67	NF3	4.32	3.67
	FF4	3.16	5.33	HF4	6.34	3.33	NF4	5.09	3.33
	FF5	2.93	5.67	HF5	6.05	5	NF5	5.02	3.67
	FF6	3.02	5.67	HF6	6.55	5.33	NF6	4.59	3
	FF7	2.16	5.67	HF7	6.09	4	NF7	3.89	3.33
	FF8	2.7	8	HF8	7.07	5	NF8	4.8	4.67
	FF9	2.77	6.33	HF9	6.16	5	NF9	4.23	4.33
	FF10	3.02	6	HF10	6.02	5.67	NF10	4.34	3.33
	FF11	2.11	6.67	HF11	6.93	4.33	NF11	3.45	4.67
	FF12	2.64	5.33	HF12	6.57	5.33	NF12	3.91	4
	FF13	2.86	5	HF13	6.98	5.67	NF13	4.77	4.33
	FF14	2.34	7.67	HF14	6.75	5	NF14	4.59	4
	FF15	3.68	5.33	HF15	6.39	4.67	NF15	4.43	5
	FF16	2.43	5.67	HF16	6.5	4	NF16	4.25	4.67
	FF17	2.82	6.67	HF17	6.23	6	NF17	4.68	3.67
	FF18	2.79	4.5	HF18	6.5	5.67	NF18	4.43	5
	FF19	2.37	4.97	HF19	6.09	5.67	NF19	4.59	3.33
	FF20	2.55	4.58	HF20	6.27	4	NF20	4.48	5.33
	FF21	2.39	5.29	HF21	6.57	3	NF21	4.86	3.67
	FF22	2.47	4.95	HF22	6.64	7	NF22	4.3	4.33
	FF23	2.24	4.89	HF23	6.52	7	NF23	3.89	4
	FF24	2.26	5.66	HF24	6.41	6.67	NF24	5.07	3
Mean		2.70083	5.77125		6.44875	5.04208		4.40333	4.02792
SD		0.437035	1.0035		0.345635	1.06512		0.469585	0.666353
male	FF25	2.98	7.33	HF25	5.66	5.33	NF25	5.45	3.67
	FF26	2.98	3.67	HF26	5.95	4.33	NF26	3.93	3.33
	FF27	3.09	6	HF27	6.43	7	NF27	3.84	4
	FF28	2.23	7.67	HF28	4.89	6.67	NF28	4.34	2.67
	FF29	2.52	8	HF29	5.86	4	NF29	3.75	3.33
	FF30	2.45	6	HF30	6.11	5.33	NF30	3.52	4
	FF31	3	6.67	HF31	6.64	5.67	NF31	3.23	4.67
	FF32	1.98	8	HF32	6.66	7.67	NF32	4.16	2.67
	FF33	2.86	7.33	HF33	6.7	6.67	NF33	4.14	3.33
	FF34	2.82	6.67	HF34	5.11	6.33	NF34	4.25	3.33
	FF35	2.68	7.33	HF35	5.18	5.33	NF35	3.86	3.33
	FF36	2.84	6	HF36	6.48	6	NF36	3.57	4
	FF37	2.57	4.33	HF37	6.59	7	NF37	3.89	4.67
	FF38	2.75	6	HF38	6.93	5	NF38	4.14	3.33
	FF39	3.48	3.33	HF39	5.91	5.33	NF39	4.3	3.33
	FF40	2.43	7	HF40	5.34	5.33	NF40	3.48	3.33
	FF41	1.92	6.24	HF41	5.93	4.33	NF41	5.02	3.33
	FF42	1.79	6.29	HF42	6.27	5	NF42	3.91	3.33
	FF43	2.18	5.55	HF43	6.32	4.67	NF43	3.93	3.67
	FF44	1.92	6.05	HF44	5.86	6	NF44	3.77	3.33
	FF45	2.53	5.03	HF45	6.64	5.67	NF45	4.18	3.67
	FF46	2.26	5.53	HF46	6.27	6	NF46	2.89	3.67
	FF47	2.29	5.29	HF47	7.39	7	NF47	4.25	4
	FF48	2.26	5.39	HF48	6.91	6	NF48	4.34	3.67
Mean		2.53375	6.1125		6.16792	5.73583		4.00583	3.56917
SD		0.428849	1.24099		0.626217	0.953934		0.526959	0.48737
Materials Experiment 1
	index	Valence	Arousal	index	Valence	Arousal	index	Valence	Arousal
Female	FF1	2.72	7.31	HF1	7	6.67	NF1	4.58	2.92
	FF2	3.64	5.89	HF2	7.77	6.67	NF2	4.5	2.97
	FF3	3.19	6.53	HF3	6.5	6	NF3	4.83	2.56
	FF4	2.83	7	HF4	7.61	6	NF4	5.22	3.14
	FF5	3.53	6.08	HF5	6.18	6.33	NF5	5.44	3.42
	FF6	2.5	6.83	HF6	6.02	7	NF6	4.81	2.56
	FF7	3.25	6.36	HF7	6.42	5.36	NF7	4.81	3.19
	FF8	2.86	6.39	HF8	6.02	5.67	NF8	4.64	2.36
	FF9	3.36	6.08	HF9	6.75	5.42	NF9	4.5	2.97
	FF10	2.89	6.67	HF10	6.98	5.67	NF10	4.22	3.03
	FF11	3.17	6.39	HF11	6.09	7	NF11	4.17	2.67
	FF12	2.94	6.47	HF12	6.25	6	NF12	4.78	2.81
	FF13	3.89	5.81	HF13	6.23	6	NF13	4.72	2.61
	FF14	2.28	6.53	HF14	6.64	7	NF14	4.94	2.64
	FF15	3.19	6.5	HF15	6.14	6.33	NF15	4.44	2.67
	FF16	3.89	5.72	HF16	6.41	6.67	NF16	4.75	3.17
	FF17	3.22	6.72	HF17	7.11	5.86	NF17	5.06	3.06
	FF18	4.03	6.31	HF18	7.11	5.95	NF18	5	2.83
	FF19	3.36	5.89	HF19	7.83	7.17	NF19	4.67	3.03
	FF20	3.31	5.94	HF20	7.14	6.06	NF20	4.86	2.58
	FF21	3.03	6.28	HF21	7.06	6.14	NF21	4.89	2.64
	FF22	3.39	6.17	HF22	7.06	6.19	NF22	4	3.69
	FF23	3.14	6.06	HF23	7.36	6.14	NF23	4.83	2.47
	FF24	3	6.33	HF24	7.06	6.14	NF24	5.06	2.56
		3.19208	6.34417		6.78083	6.22667		4.73833	2.85625
		0.422261	0.38825		0.556721	0.501508		0.328788	0.322798
Male	FF25	2.86	6.97	HF25	6.11	5.33	NF25	5.19	3.14
	FF26	4.25	4.81	HF26	5.86	6	NF26	4.5	2.94
	FF27	3.47	6.03	HF27	5.93	5.33	NF27	4.47	2.58
	FF28	2.92	6.36	HF28	6.27	6	NF28	4.42	2.92
	FF29	2.97	6.92	HF29	6.67	5.58	NF29	4.75	3.03
	FF30	3.81	6.08	HF30	7.19	5.75	NF30	4.19	3
	FF31	3.22	6.11	HF31	7.03	5.89	NF31	3.86	3.25
	FF32	3.42	5.97	HF32	7.92	7.11	NF32	4.44	3.08
	FF33	3.92	5.53	HF33	7.19	5.94	NF33	4.5	2.61
	FF34	3.36	6.44	HF34	6.78	5.94	NF34	4.81	2.89
	FF35	2.61	7.06	HF35	7.69	7	NF35	4.25	2.53
	FF36	2.81	6.64	HF36	7.64	6.5	NF36	4.22	2.75
	FF37	3.39	5.69	HF37	7.14	6.19	NF37	4.44	2.75
	FF38	3	6.75	HF38	6.56	5.61	NF38	5.19	3.03
	FF39	2.64	6.75	HF39	7.06	5.58	NF39	4.78	2.94
	FF40	3.19	6.67	HF40	7.67	6.64	NF40	4.17	3.47
	FF41	3.61	5.89	HF41	7.53	6.39	NF41	5.44	3.75
	FF42	3.03	6.08	HF42	7.58	6.97	NF42	4.28	3.36
	FF43	2.72	6.69	HF43	7.67	6.75	NF43	4.61	2.97
	FF44	3.61	5.67	HF44	7.14	6.67	NF44	4.83	2.58
	FF45	2.58	7.06	HF45	6.61	5.58	NF45	4.31	2.97
	FF46	2.69	7.08	HF46	7.08	6.22	NF46	3.94	3.03
	FF47	3.03	6.78	HF47	7.28	6.53	NF47	4.36	2.94
	FF48	3.31	6.58	HF48	6.69	5.58	NF48	4.81	2.86
Mean		3.18417	6.35875		7.01208	6.12833		4.53167	2.97375
SD		0.444883	0.579372		0.582834	0.54388		0.387497	0.286596
Materials Experiment 2
Female	index	Valence	Arousal
	F001	7	5.29
	F002	7.94	6.41
	F003	5.47	4.35
	F004	5.12	4
	F005	4.24	3.18
	F006	4	3.47
	F007	4.47	3.06
	F008	5.47	3.41
	F009	7.88	6.82
	F010	5.06	3.35
	F011	4.29	3.82
	F012	6.47	4.35
	F013	7.47	5.76
	F014	6.88	4.94
	F015	8.12	6.82
	F016	4.24	3.94
	F017	6.82	4.94
	F018	4.71	3.65
	F019	7.12	5.59
	F020	5.71	4.76
	F021	4.18	3.59
	F022	6.53	4.47
	F023	6.24	4.12
	F024	3.94	3.18
	F025	5.47	3.53
	F026	4.88	3.88
	F027	4.47	3.82
	F028	6.53	4.59
	F029	5.06	3.35
	F030	5.12	3.76
	F031	4.24	3.24
	F032	4.65	3.59
	F033	4.71	3.53
	F034	6.24	4.24
	F035	5.88	4.65
	F036	4.35	2.88
	F037	5.88	4.12
	F038	3.76	3.41
	F039	5.59	3.82
	F040	7.06	5.24
	F041	5.82	3.82
	F042	5.65	4.35
	F043	4.12	3.41
	F044	4.18	3.94
	F045	4.76	3.59
	F046	5.76	4.65
	F047	6	4
	F048	6	4.41
	F097	6.65	5.94
	F098	4.53	3.65
	F099	4.59	3.29
	F100	6.18	4.53
	F101	4.59	3.88
	F102	6	4.47
	F103	5.82	3.76
	F104	6.24	4.29
	F105	4.71	4.12
	F106	5.47	3.41
	F107	4.88	3.18
	F108	5.82	4.06
	F109	5.24	4.41
	F110	4.18	3.12
	F111	6.94	4.82
	F112	5.82	4
	F113	5.06	4
	F114	4.35	4
	F115	5.41	3.88
	F116	5.59	3.82
	F117	5.71	4.59
	F118	6.94	4.94
	F119	6.65	5.24
	F120	5.24	3.59
	F121	6	4
Mean		5.53644	4.16548
SD		1.05696	0.84258
Male	F049	5.71	3.53
	F050	3.53	3.82
	F051	6.24	4.71
	F052	5.47	4.53
	F053	4.06	3.41
	F054	4.53	3.29
	F055	5.88	4.94
	F056	4.29	3.59
	F057	5.35	4
	F058	3.53	3.29
	F059	4.82	3.29
	F060	3.88	3.35
	F061	4.65	4.76
	F062	4.18	4.12
	F063	6.18	4.24
	F064	6.06	4.06
	F065	4.88	3.29
	F066	4.76	5.06
	F067	6.71	4.88
	F068	5	3.82
	F069	5.94	4.12
	F070	7	5.41
	F071	5.53	4.65
	F072	4.76	3.88
	F073	5.82	3.76
	F074	4.06	3.24
	F075	4.94	4
	F076	4.71	3.29
	F077	3.65	3.82
	F078	6.29	4.71
	F079	5.12	3.82
	F080	4.24	3.65
	F081	3.53	4.53
	F082	4.71	4.06
	F083	4.53	3.76
	F084	3.53	3.82
	F085	5.76	3.82
	F086	4.06	3.53
	F087	3.41	3.59
	F088	4.35	3.29
	F089	4.24	4.18
	F090	4.71	3.53
	F091	2.88	4.47
	F092	4.59	3.12
	F093	6.06	4.53
	F094	3.88	3.88
	F095	4.18	3.76
	F096	4.24	3.35
	F122	3.76	3.41
	F123	4.53	4.12
	F124	6.53	4.35
	F125	3.29	3.29
	F126	6.71	4.94
	F127	4	3.65
	F128	4.29	3.29
	F129	5	3.88
	F130	5.71	3.47
	F131	7.35	5.71
	F132	4.47	3.41
	F133	5.47	2.76
	F134	5.35	3.47
	F135	3.82	3.88
	F136	3.82	3.12
	F137	7	5.41
	F138	3.94	4.29
	F139	5.12	3.76
	F140	4.24	3.88
	F141	4.29	4.65
	F142	4.29	3.53
	F143	5.29	4.29
	F144	4.82	3.47
Mean		4.83831	3.93775
SD		1.01059	0.616514
